# Supplementary material for: Recent progress in energy conversion and storage of agricultural waste-derived (carbon/nano)materials: a review
Source: Royal Society of Chemistry journal article supplement (doi:10.1039/d3gc04332k), 2024-01-01
Supplement: d3gc04332k1.pdf [file d3gc04332k1.pdf]

## SUPPORTING MATERIALS

### Recent progress in energy conversion and storage of agricultural waste-derived (carbon/nano)materials: a review

Zahra Nezafat,<sup>b</sup> Yahao Dong,<sup>\*a</sup> Mahmoud Nasrollahzadeh,<sup>\*b</sup> Nasrin Shafiei,<sup>b</sup> Hanieh Gharoubi<sup>b</sup>  
and Shahrzad Javanshir<sup>c</sup>

*<sup>a</sup>Henan Key Laboratory of Green Chemistry, Collaborative Innovation Center of Henan Province for Green Manufacturing of Fine Chemicals, Henan Engineering Laboratory of Chemical Pharmaceutical and Biomedical Materials, Key Laboratory of Green Chemical Media and Reactions, Ministry of Education, School of Chemistry and Chemical Engineering, Henan Normal University, Xixiang 453007, PR China*

*<sup>b</sup>Department of Chemistry, Faculty of Science, University of Qom, Qom 3716146611, Iran*

*<sup>c</sup>Pharmaceutical and Heterocyclic Chemistry Research Laboratory, Department of Chemistry, Iran University of Science and Technology, Tehran, 16846-13114, Iran*

---

\*E-mail: dongyahao682@163.com (Y. Dong).

\*E-mail: mahmoudnasr81@gmail.com (M. Nasrollahzadeh).

## **CONTENTS**

|                                                                                                                                    |    |
|------------------------------------------------------------------------------------------------------------------------------------|----|
| <b>Table S1.</b> Energy conversion systems from agricultural waste.                                                                | 3  |
| <b>Table S2.</b> Carbonaceous compounds from agricultural waste resources, their properties, and applications for supercapacitors. | 6  |
| <b>Table S3.</b> Supercapacitors from agricultural wastes and their properties.                                                    | 9  |
| <b>Table S4.</b> Agricultural wastes-derived carbon for lithium-ion batteries (LIBs).                                              | 13 |
| <b>Table S5.</b> Agricultural wastes-derived carbon for lithium-sulfur batteries (Li-SBs).                                         | 26 |
| <b>Table S6.</b> Different agriculture wastes for DSSCs applications.                                                              | 27 |
| <b>References</b>                                                                                                                  | 29 |

**Table S1.** Agricultural waste-derived materials for energy applications.

| Entry | Agriculture waste  | Electrocatalyst                                                            | Application | BET surface area (m <sup>2</sup> g <sup>-1</sup> ) | Highlights                                                                             | Ref. |
|-------|--------------------|----------------------------------------------------------------------------|-------------|----------------------------------------------------|----------------------------------------------------------------------------------------|------|
| 1     | Fresh banana peels | N-carbon nanoparticles (NPs) and N-carbon NPs-NH <sub>3</sub> <sup>a</sup> | ORR         | 734.8 and 941.2                                    | N-CNPs-NH <sub>3</sub> showed high performance in ORR                                  | 1    |
| 2     | Pomelo peel        | N-D hierarchical porous carbon/reduced graphene oxide (rGO)                | ORR         | 1194                                               | -                                                                                      | 2    |
| 3     | Grapefruit peel    | Porous carbon                                                              | OER/ORR     | 1037 to 1194                                       | Porous carbon showed high performance as an OER/ORR catalyst in seawater               | 3    |
| 4     | Pomelo peel        | Fe <sub>2</sub> N/N-PPC <sup>b</sup>                                       | ORR         | 1103.90                                            | -                                                                                      | 4    |
| 5     | Mangosteen peel    | Nitrogen self-doped porous graphitic carbon                                | ORR         | 1168                                               | Mangosteen peel was applied as both N and C source                                     | 5    |
| 6     | Sweet potato vines | N and S self-doped porous carbon                                           | ORR         | 884.9                                              | -                                                                                      | 6    |
| 7     | Pomegranate peel   | Pt <sub>3</sub> Ni/rGO and Pt <sub>3</sub> Co/rGO                          | ORR         | -                                                  | Pt <sub>3</sub> Ni/rGO showed better catalytic performance than Pt <sub>3</sub> Co/rGO | 7    |
| 8     | Bagasse            | N-D nanoporous carbon sheets                                               | ORR         | 1284                                               | -                                                                                      | 8    |
| 9     | Pomelo peel        | N-D nanoporous carbon                                                      | ORR         | Up to 1444.9                                       | The catalyst had porous structure and high graphitic N content                         | 9    |
| 10    | Rice husks         | Si-GQD nanocomposites <sup>c</sup>                                         | ORR         | -                                                  | -                                                                                      | 10   |
| 11    | Kidney bean        | N-D porous nanocarbon                                                      | ORR         | -                                                  | -                                                                                      | 11   |
| 12    | Pomelo peel        | Metal-free N-D porous carbons                                              | ORR         | 1165                                               | -                                                                                      | 12   |

|    |                                              |                                                                                                                     |                                                       |                                      |                                                                                                                                                         |    |
|----|----------------------------------------------|---------------------------------------------------------------------------------------------------------------------|-------------------------------------------------------|--------------------------------------|---------------------------------------------------------------------------------------------------------------------------------------------------------|----|
| 13 | Banana peels                                 | $Ba_{0.5}Sr_{0.5}Co_{0.8}Fe_{0.2}O_{3-\delta}$ on N-D mesoporous carbon                                             | ORR and OER                                           | 372.3                                | -                                                                                                                                                       | 13 |
| 14 | Lignin (L), straw (S) and shaddock peel (SP) | Ru-based composites synthesized from nitrogen doped lignin, straw and shaddock peel (Ru@o-NL, Ru@o-NS and Ru@o-NSP) | HER                                                   | 680.4 (for o-NL)                     | Ru@o-NL presented better HER activity than Ru@o-NS and Ru@o-NSP                                                                                         | 14 |
| 15 | Bean sprout (BS)                             | BS-800                                                                                                              | HER and high specific capacitance for supercapacitors | 397.15                               | -                                                                                                                                                       | 15 |
| 16 | Pomelo peel                                  | NiFe@N-D carbon/carbonized pomelo peel                                                                              | ORR/OER                                               | 367.5                                | -                                                                                                                                                       | 16 |
| 17 | Watermelon peels                             | Carbon-based nanocomposites                                                                                         | OER/HER                                               | 724-1331 (in different temperatures) | Overpotential and Tafel slope of 237 mV at 10 mA cm <sup>-2</sup> and 69.8 mV dec <sup>-1</sup> , respectively for OER, overpotential of 111 mV for HER | 17 |
| 18 | Grapefruit peel                              | Ni NPs embedded in nitrogen self-doped graphene-like carbon                                                         | OER/HER                                               | 43                                   | Overpotential of 350 and 165 mV and moderate Tafel slope OER and HER of 20 and 10 mA cm <sup>-2</sup> , respectively                                    | 18 |
| 19 | Sugarcane bagasse                            | Sugarcane bagasse-based porous carbon nanofiber-supported the CoP/Co <sub>2</sub> P heterostructure                 | OER/HER                                               | 233.45                               | -                                                                                                                                                       | 19 |
| 20 | Pomegranate                                  | Pd NPs supported                                                                                                    | CO <sub>2</sub> RR and                                | -                                    | -                                                                                                                                                       | 20 |

|  |      |       |                                         |  |  |  |
|--|------|-------|-----------------------------------------|--|--|--|
|  | peel | NiO/C | alkaline direct<br>ethanol fuel<br>cell |  |  |  |
|--|------|-------|-----------------------------------------|--|--|--|

<sup>a</sup> Ammonia-activated N-D carbon NPs

<sup>b</sup> Fe<sub>2</sub>N NPs in situ immobilized over N-D porous carbon derived from pomelo peel

<sup>c</sup> Hybrid silicon nanosheets-graphene quantum dot nanocomposites.

**Table S2.** Carbonaceous compounds from agricultural waste resources, their properties, and applications for supercapacitors.

| Entry | Agricultural resource         | Carbonaceous material                                                                    | Surface area (m <sup>2</sup> g <sup>-1</sup> ) | Other properties                                                                                                                                                                                                                                                                                                     | Ref. |
|-------|-------------------------------|------------------------------------------------------------------------------------------|------------------------------------------------|----------------------------------------------------------------------------------------------------------------------------------------------------------------------------------------------------------------------------------------------------------------------------------------------------------------------|------|
| 1     | Pomelo peel                   | Two-dimensional lamellar carbon                                                          | 1927                                           | Rich in surface oxygen functional groups with a very high capacitance (398 F g <sup>-1</sup> at 1 A g <sup>-1</sup> ) and a high energy density (21 Wh kg <sup>-1</sup> at a power density of 180 W kg <sup>-1</sup> )                                                                                               | 21   |
| 2     | Sapindus Mukorossi peel (SMP) | SMP-based activated carbon                                                               | 1254.5                                         | Specific capacitance of 314.5 F g <sup>-1</sup> at 1 A g <sup>-1</sup>                                                                                                                                                                                                                                               | 22   |
| 3     | Watermelon peel               | Heteroatom-doped hierarchical porous carbon                                              | 1660                                           | High specific capacitances of up to 278 F g <sup>-1</sup> in 1 M H <sub>2</sub> SO <sub>4</sub> electrolyte                                                                                                                                                                                                          | 23   |
| 4     | Pomelo peel                   | N, O-co-doped hierarchical porous carbon                                                 | 1582                                           | Specific capacitance of 180 F g <sup>-1</sup> at 0.5 A g <sup>-1</sup>                                                                                                                                                                                                                                               | 24   |
| 5     | Orange peel                   | Porous carbon                                                                            | 912.4                                          | Specific capacitance of 375.7 F g <sup>-1</sup> at 1 A g <sup>-1</sup> and good rate retention of 50.9% from 1 to 100 A g <sup>-1</sup>                                                                                                                                                                              | 25   |
| 6     | Wheat straw cellulosic foam   | Hierarchical Porous carbon                                                               | 772                                            | Specific capacitance of 226.2 F g <sup>-1</sup> at a current density of 0.5 A g <sup>-1</sup>                                                                                                                                                                                                                        | 26   |
| 7     | Rice straw                    | N-D porous carbon                                                                        | 2786.5                                         | Capacitance of 317 F g <sup>-1</sup> at 1 A g <sup>-1</sup>                                                                                                                                                                                                                                                          | 27   |
| 8     | Durian peel                   | Activated N/P co-doped carbon with a hierarchical porous structure (84 vol % micropores) | 3416                                           | N (2.17 at. %) and P (0.48 at. %) doping amounts with specific capacitance (383.4 F g <sup>-1</sup> at 0.5 A g <sup>-1</sup> ), ideal rate performance (255.6 F g <sup>-1</sup> at 20 A g <sup>-1</sup> ), and superior cyclic performance (98.3% capacitance retention after 10 000 cycles at 5 A g <sup>-1</sup> ) | 28   |
| 9     | Rice husk                     | Activated graphene-based carbon (AGC)                                                    | 3292                                           | AGC was modified with Ni(OH) <sub>2</sub> with 9 wt.% loading and used for supercapacitor applications with a                                                                                                                                                                                                        | 29   |

|    |                  |                                                       |                     |                                                                                                                                                                                                                                                         |    |
|----|------------------|-------------------------------------------------------|---------------------|---------------------------------------------------------------------------------------------------------------------------------------------------------------------------------------------------------------------------------------------------------|----|
|    |                  |                                                       |                     | specific capacitance of up to 300 F g <sup>-1</sup> at a current density of 50 mA g <sup>-1</sup>                                                                                                                                                       |    |
| 10 | Wheat straw      | Porous carbon                                         | 1905                | Pore distribution of 0.62 cm <sup>3</sup> g <sup>-1</sup> and meso-/macropores content of 0.53 cm <sup>3</sup> g <sup>-1</sup> with the oxygen content of up to 21.6% and high specific capacitance of 268.5 F g <sup>-1</sup> at 0.5 A g <sup>-1</sup> | 30 |
| 11 | Orange peel      | Nitrogen and oxygen co-doped carbon                   | 917.66              | Specific capacitance of 282.3 F g <sup>-1</sup> at 1 A g <sup>-1</sup>                                                                                                                                                                                  | 31 |
| 12 | Rice husk        | Nitrogen and phosphorus co-doped porous carbon        | 2188                | Pore volume of 3.025 cm <sup>3</sup> g <sup>-1</sup> , pore diameter (PD) of 5.537 nm and specific capacitance of 236 F g <sup>-1</sup> at a current density of 0.5 A g <sup>-1</sup>                                                                   | 32 |
| 13 | Orange peel      | Orange peel carbon (OPC800)                           | 2004                | Pore volume of 1.24 cm <sup>3</sup> g <sup>-1</sup> and maximum specific capacitance of 306.6 F g <sup>-1</sup> at 0.5 A g <sup>-1</sup>                                                                                                                | 33 |
| 14 | Mangosteen peel  | Porous carbon                                         | 2623                | Specific capacitance of 357 F g <sup>-1</sup> at 1 A g <sup>-1</sup>                                                                                                                                                                                    | 34 |
| 15 | Coconut husk     | Activated carbon                                      | From 823 to 1033.20 | Specific capacitance of 184 F g <sup>-1</sup>                                                                                                                                                                                                           | 35 |
| 16 | Rice husk        | Activated carbon/polyaniline                          | 2265                | Specific capacitance of 465 F g <sup>-1</sup> in 1 M H <sub>2</sub> SO <sub>4</sub> at discharge current density 0.2 A g <sup>-1</sup> with polyaniline content 60 wt.%                                                                                 | 36 |
| 17 | Rice husk        | Graphene nanosheets                                   | ~1225               | Specific capacitance of 115 F g <sup>-1</sup> at 0.5 mA cm <sup>-2</sup>                                                                                                                                                                                | 37 |
| 18 | Pomegranate husk | N-D porous nanosheets carbon                          | 1754.8              | Pore volume of 1.05 cm <sup>3</sup> g <sup>-1</sup> , nitrogen doping content of 4.51 wt% and a high specific capacitance of 254 F g <sup>-1</sup> at a current density of 0.5 A g <sup>-1</sup>                                                        | 38 |
| 19 | Rice husk        | Mesoporous carbons                                    | 1737                | Specific capacitance and energy density of 157 F g <sup>-1</sup> and 84 Wh kg <sup>-1</sup> at 0.05 A g <sup>-1</sup> , respectively                                                                                                                    | 39 |
| 20 | Banana peel      | Nitrogen-doped banana peel-derived porous carbon foam | 1357.6              | Pore volume of 0.77 cm <sup>3</sup> g <sup>-1</sup> , mesopore size distributions around 3.9 nm and specific capacitance of 185.8 F g <sup>-1</sup> at 5 mV s <sup>-1</sup> and 210.6 F g <sup>-1</sup> at 0.5 A g <sup>-1</sup> in 6                   | 40 |

|    |           |                             |        | M KOH aqueous electrolyte                                                                                                |               |
|----|-----------|-----------------------------|--------|--------------------------------------------------------------------------------------------------------------------------|---------------|
| 21 | Rice husk | Activated carbon            | 2516   | Average pore diameter of 3.02 nm                                                                                         | <sup>41</sup> |
| 22 | Rice husk | Mesoporous carbon           | 2009   | Mesoporosity of 90.8% with a specific capacitance of 176 F g <sup>-1</sup> at a current density of 50 mA g <sup>-1</sup> | <sup>42</sup> |
| 23 | Rice husk | Nanoporous activated carbon | 2523.4 | Specific capacitance of 250 F g <sup>-1</sup> at the current density of 1 A g <sup>-1</sup>                              | <sup>43</sup> |



**Table S3.** Supercapacitors from agricultural wastes and their properties.

| Entry | Agricultural precursor          | Prepared material                                      | Specific capacitances (F g <sup>-1</sup> )/ current density (A g <sup>-1</sup> )                                       | Capacitance retention / cycles | Energy density (Wh kg <sup>-1</sup> )                                                    | Ref. |
|-------|---------------------------------|--------------------------------------------------------|------------------------------------------------------------------------------------------------------------------------|--------------------------------|------------------------------------------------------------------------------------------|------|
| 1     | <i>Citrus bergamia</i> peel     | Activated carbon-H <sub>3</sub> PO <sub>4</sub>        | 142/ 0.1                                                                                                               | 101%/ 5000                     | -                                                                                        | 44   |
|       |                                 | Activated carbon-Mn <sub>3</sub> O <sub>4</sub>        | 289/ 0.1                                                                                                               | 88%/ 5000                      | 50.8 at a power density of 240 W kg <sup>-1</sup>                                        |      |
| 2     | Dragon fruit peel               | N-D mesoporous dominated hierarchical activated carbon | 427/ -                                                                                                                 | 109%/ 5000                     | 112 Wh kg <sup>-1</sup> at a power of 3214 W kg <sup>-1</sup>                            | 45   |
| 3     | Mangosteen peels                | Liquefied bio-carbon nanofibers                        | 365.5/ 0.5                                                                                                             | 97.7%/ 10000                   | 18 at a power density of 348.9 W kg <sup>-1</sup> at 1 A g <sup>-1</sup> current density | 46   |
| 4     | Potato peel                     | Sulfur and phosphorus co-doped porous activated carbon | 323/ 1                                                                                                                 | 94.3%/ 10000                   | 45.5 at a power density of 800 W kg <sup>-1</sup>                                        | 47   |
| 5     | Buckwheat husk                  | Nitrogen, sulfur and oxygen-co-doped porous carbon     | 285/ 1                                                                                                                 | 96%/ 30                        | 6.60 at a power density of 250 W kg <sup>-1</sup>                                        | 48   |
| 6     | <i>Areca catechu</i> Husk (ACH) | Carbon nanofiber                                       | 181.96/ -                                                                                                              | -                              | 25.27 for power density of 91.07 W kg <sup>-1</sup>                                      | 49   |
| 7     | Potato peel                     | Copper phthalocyanine/activated carbon                 | 237/ 0.1                                                                                                               | 80%/ 1000                      | -                                                                                        | 50   |
| 8     | Orange peel                     | Boroncarbonitride                                      | 209/ 2.5                                                                                                               | -                              | -                                                                                        | 51   |
| 9     | Corn husk                       | Hierarchical porous carbon                             | 314.83 at 1 mV s <sup>-1</sup> and 297.81 at 5 mA cm <sup>-2</sup> in 0.5 M H <sub>2</sub> SO <sub>4</sub> electrolyte | -                              | 9.85 at a high-power density of 7185 W kg <sup>-1</sup>                                  | 52   |
| 10    | Garlic peel                     | 3D hierarchical porous carbon                          | 426/ 1                                                                                                                 | -                              | 59.57 and 49.18 at power density                                                         | 53   |

|    |                |                                                                 |            |                                                              |                                                                                                     |    |
|----|----------------|-----------------------------------------------------------------|------------|--------------------------------------------------------------|-----------------------------------------------------------------------------------------------------|----|
|    |                |                                                                 |            |                                                              | of 190.06 W kg <sup>-1</sup> and 16.24 KW kg <sup>-1</sup> , respectively                           |    |
| 11 | Rice husk      | Porous rice husk-based activated carbon                         | 147/ 0.5   | 92%/ 10000 at 1 A g <sup>-1</sup>                            | -                                                                                                   | 54 |
| 12 | Mung bean husk | Original bio-structured porous carbon (PC <sub>3-600</sub> )    | 390/ 1     | 73.5% at a high current density of 50 A g <sup>-1</sup>      | -                                                                                                   | 55 |
|    |                | 3D architecture porous carbon (HPC <sub>2-700</sub> )           | 353/ 1     | 76.48% at a high current density of 50 A g <sup>-1</sup>     | Energy density of 20.4 at 872 W kg <sup>-1</sup> in 1 M Na <sub>2</sub> SO <sub>4</sub> electrolyte |    |
|    |                | Porous carbon block (HPPC <sub>2-700</sub> )                    | 304/ 1     | 77.3% at a high current density of 50 A g <sup>-1</sup>      | -                                                                                                   |    |
| 13 | Corn straw     | Hierarchical porous carbon based on corn straw carbon nanofiber | 376.5/ 0.5 | 94.18%/ 5000 at the current density of 2 A g <sup>-1</sup>   | -                                                                                                   | 56 |
| 14 | Buckwheat husk | Nitrogen doped 3D hierarchical porous carbon                    | 326/ 1     | 95% of the initial capacitance at 5 A g <sup>-1</sup> / 5000 | 20.4 at a power density of 699 W kg <sup>-1</sup>                                                   | 57 |
| 15 | Durian peel    | Activated carbon/CDs                                            | 60/ -      | -                                                            | -                                                                                                   | 58 |
| 16 | Orange peel    | N-D porous carbon                                               | 268/ -     | 92%/ up to 6000                                              | 32.08 at a power density of 700.43 W kg <sup>-1</sup>                                               | 59 |
| 17 | Pomelo peel    | Nitrogen/sulfur dual-doped sponge-like porous carbon (NSC-600)  | 310/ 0.5   | 98.8%/ 10000                                                 | 21.4 at a power density of 259.9 W kg <sup>-1</sup>                                                 | 60 |
| 18 | Rice husk      | Activated carbon                                                | 315/ 0.5   | -                                                            | -                                                                                                   | 61 |
| 19 | Pomelo peel    | CuS nanosheets-based                                            | 954/ 1     | 81.99% at 7                                                  | -                                                                                                   | 62 |

|    |                |                                                                        |                                |                                                       |                                                                                                   |    |
|----|----------------|------------------------------------------------------------------------|--------------------------------|-------------------------------------------------------|---------------------------------------------------------------------------------------------------|----|
|    |                | 3D micro-flowers grown on pomelo peel-derived porous activated carbon  |                                | A g <sup>-1</sup> / 5000                              |                                                                                                   |    |
| 20 | Ginger straw   | Ginger straw-based porous carbon                                       | 274/ 0.1                       | 88%/ 6000 at a current density of 5 A g <sup>-1</sup> | 34.06 at a power density of 4.35 kW kg <sup>-1</sup>                                              | 63 |
| 21 | Pineapple peel | Carbon/ZnMn <sub>2</sub> O <sub>4</sub> composite                      | 104.89/ 300 mA g <sup>-1</sup> | 97.06%/ 5000                                          | -                                                                                                 | 64 |
| 22 | Rice husk      | Rice husk activated carbon/NiCo <sub>2</sub> S <sub>4</sub>            | 133.3/ 0.2 A                   | 86%/ 5000 at a current density of 1 A g <sup>-1</sup> | 41.6 at power density of 150 W kg <sup>-1</sup>                                                   | 65 |
| 23 | Rice husk      | Poly(3,4-ethylenedioxythiophene)-CO <sub>2</sub> @C hybrid             | 458/ 1                         | ~98%/ 5000                                            | 280 at power density of ~1 kW kg <sup>-1</sup>                                                    | 66 |
| 24 | Rice husk      | Hierarchical micro-/mesoporous carbon                                  | 302.2/ 1                       | 88.5%/ 5000                                           | -                                                                                                 | 67 |
| 25 | Pomelo peel    | Nitrogen-doped hierarchical porous carbon600 (Porous carbon at 600 °C) | 208.7/ 1                       | -                                                     | 7.3 at a current density of 1 A g <sup>-1</sup> in 1 M H <sub>2</sub> SO <sub>4</sub> electrolyte | 68 |
| 26 | Banana peel    | Porous carbon electrode                                                | 258-273/ 0.1                   | 90%/ 1000                                             | -                                                                                                 | 69 |
| 27 | Rice husk      | Activated carbon                                                       | 168/ 250 mA g <sup>-1</sup>    | -                                                     | -                                                                                                 | 70 |
| 28 | Banana peel    | MnO <sub>2</sub> /biomass-derived porous carbon                        | 139.6/ 300 mA g <sup>-1</sup>  | 92.3%/ 1000 at 1 A g <sup>-1</sup>                    | -                                                                                                 | 71 |
| 29 | Wheat husk     | NiO@porous carbon                                                      | 500/ 10                        | 92%/ 8000                                             | -                                                                                                 | 72 |
| 30 | Rice straw     | Graphene-like activated carbon                                         | 255/ 0.5                       | 98%/ 10000                                            | -                                                                                                 | 73 |
| 31 | Rice husk      | Rice husk porous carbon                                                | 260/ 1                         | 86%/ 10000                                            | -                                                                                                 | 74 |
| 32 | Shaddock peel  | N-doped activated shaddock peel carbon/graphene/bacterial cellulose    | 250.5/ -                       | 97%/ 10000                                            | -                                                                                                 | 75 |

|    |                 |                                                                      |                    |                                      |                                                                                                      |    |
|----|-----------------|----------------------------------------------------------------------|--------------------|--------------------------------------|------------------------------------------------------------------------------------------------------|----|
| 33 | Pomelo peel     | Oxygen-rich hierarchical porous carbon                               | 222.6/ 0.5         | 99%/ 5000                            | -                                                                                                    | 76 |
| 34 | Rice husk       | Silica-free rice husk-derived porous carbon                          | 220/ 0.5           | 98%/ 10000                           | -                                                                                                    | 77 |
| 35 | Pomelo peel     | Cobalt nickel aluminum layered double hydroxide@carbonaceous aerogel | 1134/ 1<br>902/ 10 | -                                    | -                                                                                                    | 78 |
| 36 | Grapefruit Peel | Hierarchically porous N-doped carbon nanosheets                      | Up to 311/-        | 94.1%/ 10000                         | 17.7 at a power density of 1100 W kg <sup>-1</sup> in 1 M H <sub>2</sub> SO <sub>4</sub> electrolyte | 79 |
| 37 | Pomelo peel     | 3D porous framework-like N-D carbon                                  | 260/ 1             | 84.2%/ 10000 at 10 A g <sup>-1</sup> | -                                                                                                    | 80 |

**Table S4.** Agricultural wastes-derived carbon for lithium-ion batteries (LIBs).

| Entry | Source               | Prepared material                                                                        | Electrolyte                                                                                                                               | Highlights                                                                                                                                                                                         | Ref. |
|-------|----------------------|------------------------------------------------------------------------------------------|-------------------------------------------------------------------------------------------------------------------------------------------|----------------------------------------------------------------------------------------------------------------------------------------------------------------------------------------------------|------|
| 1     | Rice husk            | Nanoporous silicon@graphitized carbon composites                                         | LiPF <sub>6</sub> solution (1 M) in a mixture of ethylene carbonate/dimethyl carbonate/fluoroethylene carbonate (EC/DMC/FEC, 3:6:1 v/v/v) | Initial coulombic efficiency of 41% and the reversible specific capacity of 681.8 mAh g <sup>-1</sup> after 100 times at 0.2 A g <sup>-1</sup>                                                     | 81   |
| 2     | Rice husk and lignin | Si/C as an anode material                                                                | 1 M LiPF <sub>6</sub> in a mixture of EC:ethyl methyl carbonate (EMC):DMC (1:1:1, v/v/v)                                                  | High specific capacity retention of 572 mAh g <sup>-1</sup> at 1 A g <sup>-1</sup> after 1000 cycles                                                                                               | 82   |
| 3     | Rice husk            | Si/C as an anode material                                                                | 1 M LiPF <sub>6</sub> in a mixture of EC and DMC (1:1 vol%)                                                                               | Reversible capacity of up to 1247.8 mAh g <sup>-1</sup> with 92.4% capacity retention over 50 cycles                                                                                               | 83   |
| 4     | Rice husk            | Si@SiO <sub>2</sub> @C as an anode material                                              | 1 M LiPF <sub>6</sub> in a 1:1 mixture of EC and diethyl carbonate (DEC)                                                                  | After 200 cycles at 1 A g <sup>-1</sup> , the anode delivered a reversible capacity of 973.1 mAh g <sup>-1</sup> , showing a capacity retention of 93.1% and a Coulombic efficiency of above 99.7% | 84   |
| 5     | Rice husk            | Si/C composite as an anode material                                                      | -                                                                                                                                         | Capacity retention rate above 90% after 150 cycles at the charge/discharge rate of 0.5 C (1 C = 600 mAh g <sup>-1</sup> )                                                                          | 85   |
| 6     | Rice husk            | Pitaya-like SiO <sub>x</sub> /nitrogen-doped carbon superstructures prepared as an anode | 1 M LiPF <sub>6</sub> in EC and DMC (volume ratio of 1:1) with 5% FEC                                                                     | Specific capacity of 622.8 mAh g <sup>-1</sup> after 100 cycles at 0.1 A g <sup>-1</sup> and an excellent long cycle performance of 190.1 mAh g <sup>-1</sup> after 5000                           | 86   |

|    |           |                                                                                       |                                                    | cycles at 5 A g <sup>-1</sup>                                                                                         |    |
|----|-----------|---------------------------------------------------------------------------------------|----------------------------------------------------|-----------------------------------------------------------------------------------------------------------------------|----|
| 7  | Rice husk | C/SiO <sub>2</sub> composite as an anode material                                     | 1 M LiPF <sub>6</sub> in EC:EMC:DEC (1:1:1, v/v/v) | Reversible specific capacity of 553 mAh g <sup>-1</sup> after 100 cycles at 0.1 A g <sup>-1</sup>                     | 87 |
| 8  | Rice husk | Porous N-D carbon/SiO <sub>x</sub> composite as an anode material                     | 1 M LiPF <sub>6</sub> in EC:EMC:DEC (1:1:1, v/v/v) | Reversible capacity up to 1018.5 mAh g <sup>-1</sup> at 0.1 A g <sup>-1</sup>                                         | 88 |
| 9  | Rice husk | Hierarchically porous SiO <sub>2</sub> /N-D carbon composites as anode materials      | 1 M LiPF <sub>6</sub> in DMC/EC (1:1 v/v)          | Reversible capacity of 556 mAh g <sup>-1</sup> over 1000 cycles at 1 A g <sup>-1</sup>                                | 89 |
| 10 | Rice husk | Rice husk-derived silicon-tin/N-D graphene composite nanostructure as anode materials | 1 M LiPF <sub>6</sub> in the DMC/EC (1:1 v/v)      | The composite with 10% Sn and 10% Si on N-D graphene delivered a capacity of 480 mAh g <sup>-1</sup> after 100 cycles | 90 |
| 11 | Rice husk | SiO <sub>2</sub> /C and Si/C composites as anode materials                            | 1 M LiPF <sub>6</sub> in EC/DEC (1:1 vol%)         | -                                                                                                                     | 91 |
| 12 | Rice husk | Rice husk-derived SiO <sub>x</sub> @carbon nanocomposites                             | 1 M LiPF <sub>6</sub> in EC/DMC (1:1)              | The anode showed a reversible capacity of 1315 mAh g <sup>-1</sup> after 100 cycles at 100 mA g <sup>-1</sup>         | 92 |
| 13 | Rice husk | Rice husk-derived carbon@SnO <sub>2</sub> @rGO composite as an anode electrode        | 1 M LiPF <sub>6</sub>                              | The anode showed a reversible capacity of 1206.9 mAhg <sup>-1</sup> at a current density of 0.2 C after 100 cycles    | 93 |
| 14 | Rice husk | Rice husk lignin-based porous carbon and ZnO composite as an anode material           | -                                                  | The anode showed a discharge capacity of 898.1 mAh g <sup>-1</sup> at 0.2 C after 110 cycles                          | 94 |
| 15 | Rice husk | Rice husk-based C/SiO <sub>2</sub> composites as anode materials                      | 1 M LiPF <sub>6</sub> in EC:DEC:DMC (1:1:1, v/v/v) | Good cycling performance under a current density of 100 mA g <sup>-1</sup>                                            | 95 |

|    |               |                                                                      |                                                                                                          |                                                                                                                                                                                  |     |
|----|---------------|----------------------------------------------------------------------|----------------------------------------------------------------------------------------------------------|----------------------------------------------------------------------------------------------------------------------------------------------------------------------------------|-----|
| 16 | Rice husk     | C/SnO <sub>2</sub> composite anode                                   | 1 M LiPF <sub>6</sub> in a mixture of propylene carbonate, EC and DMC (1:1:1 in volume)                  | The results showed the fifty-discharge capacity of 550 mAh g <sup>-1</sup> at current density of 100 mA g <sup>-1</sup> (180 mAh g <sup>-1</sup> for SnO <sub>2</sub> anodes)    | 96  |
| 17 | Rice husk     | P-doped porous carbon/SiO <sub>x</sub> composites as anode materials | 1 M LiPF <sub>6</sub> in EC:DMC:EMC (1:1:1, v/v/v) with 5% FEC                                           | Capacity of 1151.8 mAh g <sup>-1</sup> at 0.1 A g <sup>-1</sup>                                                                                                                  | 97  |
| 18 | Rice husk     | N-D carbon/SiO <sub>x</sub> composites as anode materials            | 1 M LiPF <sub>6</sub> in EC, DMC and DEC (1:1:1 in volume)                                               | The composite displayed high reversible capacity (at a current density of 100 mA g <sup>-1</sup> , after 100 cycles the discharge capacity as high as 1110 mAh g <sup>-1</sup> ) | 98  |
| 19 | Rice husk     | SiO <sub>2</sub> /C as anode materials                               | 1 M LiPF <sub>6</sub> dissolved in an equal volume mixture of EC and DMC                                 | Capacity of 756.9 mAhg <sup>-1</sup> after 150 charge-discharge cycles at 0.2 C and 620 mAh g <sup>-1</sup> after 600 cycles at 2 C                                              | 99  |
| 20 | Rice husk ash | SiO <sub>2</sub> /C composite as an anode material                   | 1 M LiPF <sub>6</sub> in EC:EMC:DMC (1:1:1, v/v/v)                                                       | Reversible specific capacity of 404 mAh g <sup>-1</sup> over 500 cycles at 0.25 C                                                                                                | 100 |
| 21 | Rice husk     | Rice husk-nano Si@C/CNT as anode materials                           | 1 M LiPF <sub>6</sub> and 6 vol% of vinylene carbonate in a solution of EC and DEC (volume ratio of 1:1) | Reversible capacity of 989.5 mAh g <sup>-1</sup> at 0.5 C (1 C = 4.2 A g <sup>-1</sup> ) and 345 mAh g <sup>-1</sup> at 3 C                                                      | 101 |
| 22 | Rice husk     | ZnO/CoO@rice husk-Cellulose nanocomposites as anode materials        | -                                                                                                        | Capacity of 972 mAh g <sup>-1</sup> over 150 cycles at 100 mA g <sup>-1</sup>                                                                                                    | 102 |
| 23 | Rice husk     | SiO <sub>2</sub> as an anode                                         | 1 M LiPF <sub>6</sub> in a mixture of                                                                    | Initial discharge                                                                                                                                                                | 103 |

|    |           |                                                                                        |                                                                                                                    |                                                                                                                                                                               |     |
|----|-----------|----------------------------------------------------------------------------------------|--------------------------------------------------------------------------------------------------------------------|-------------------------------------------------------------------------------------------------------------------------------------------------------------------------------|-----|
|    |           | material                                                                               | EC/DEC/DMC (1:1:1, v/v/v)                                                                                          | capacity of 1049 mAhg <sup>-1</sup>                                                                                                                                           |     |
| 24 | Rice husk | Rice husk-based 3D porous silicon/carbon nanocomposites as anode materials             | 1 M LiPF <sub>6</sub> in a mixture of EC/DEC/DMC (1:1:1, v/v/v)                                                    | Reversible capacity of 345 mAh g <sup>-1</sup> after 100 cycles at 50 mA g <sup>-1</sup>                                                                                      | 104 |
| 25 | Rice husk | Rice husk lignin-derived porous carbon as an anode material                            | 1 M LiPF <sub>6</sub> in EC and DMC (1:1, v/v)                                                                     | Specific capacity of 469 mAh g <sup>-1</sup> after 100 cycles                                                                                                                 | 105 |
| 26 | Rice husk | MoS <sub>2</sub> @rice husk carbon composite anode                                     | 1 M LiPF <sub>6</sub> in a mixture of EC and DMC (1:1 w/w)                                                         | The composite delivered average discharge capacities of 280, 260, 234 and 186 mAh g <sup>-1</sup> at current density of 40, 60, 80, and 100 mA g <sup>-1</sup> , respectively | 106 |
| 27 | Rice husk | Activated carbon-decorated spherical silicon nanocrystal composites as anode materials | 1 M LiPF <sub>6</sub> in 1:1 mixture of OC(OCH <sub>3</sub> ) <sub>2</sub> and (CH <sub>2</sub> O) <sub>2</sub> CO | Reversible specific capacity of 429 mAh g <sup>-1</sup> after 100 cycles                                                                                                      | 107 |
| 28 | Rice husk | Silicon derived from Rice husks                                                        | 1 M LiPF <sub>6</sub> in a mixture of EC and DEC (1:1, w/w) with 10 w% EFC                                         | The material delivered initial discharge and charge capacities of 3844.7 and 3144.4 mAh g <sup>-1</sup> at the current density of 100 mA g <sup>-1</sup>                      | 108 |
| 29 | Rice husk | Rice husk-derived Si-Sn/nitrogen-doped rGO nanocomposites as anode materials           | 1 M LiPF <sub>6</sub> in EC/DMC (1:1 v/v)                                                                          | The composite delivered an initial capacity of 1600 mAh g <sup>-1</sup>                                                                                                       | 109 |
| 30 | Rice husk | Rice husk-derived activated carbon as an anode material                                | 1 M LiPF <sub>6</sub> in a 1:1 (V/V) mixture of EC and DMC                                                         | The anode delivered reversible specific capacity of 448 mAh g <sup>-1</sup> after 100 cycles at a rate of 0.2 C                                                               | 110 |



|    |               |                                                                                   |                                                                     |                                                                                                                                                                                                                                                                        |     |
|----|---------------|-----------------------------------------------------------------------------------|---------------------------------------------------------------------|------------------------------------------------------------------------------------------------------------------------------------------------------------------------------------------------------------------------------------------------------------------------|-----|
| 31 | Rice husk     | Si-Co/Nitrogen-doped rGO as an anode material                                     | LiPF <sub>6</sub> solution in EC/DMC (1:1 V/V)                      | Initial capacity of 975 mAh g <sup>-1</sup>                                                                                                                                                                                                                            | 111 |
| 32 | Rice husk     | Rice husk-Porous-Si/C/rGO as anode materials                                      | 1 M LiPF <sub>6</sub> solution (mixed EC:DEC as solvent 50:50)      | Capacity of 760 mAh g <sup>-1</sup> after 100 cycles at the current density of 100 mA g <sup>-1</sup>                                                                                                                                                                  | 112 |
| 33 | Rice husk     | ZnO/rice husk-based hollow carbonaceous nanosphere composite as an anode material | -                                                                   | Specific charge capacity of 920 mAh g <sup>-1</sup> at 0.2 C after 100 cycles                                                                                                                                                                                          | 113 |
| 34 | Rice husk ash | Nano-silica materials                                                             | -                                                                   | -                                                                                                                                                                                                                                                                      | 114 |
| 35 | Rice husk     | SiO <sub>2</sub> /C composite as anode materials                                  | 1 M LiPF <sub>6</sub> in EC, EMC and DEC (1 :1 :1, v/v/v)           | Reversible capacity of 827 mAh g <sup>-1</sup> over 300 cycles at the current density of 100 mA g <sup>-1</sup>                                                                                                                                                        | 115 |
| 36 | Rice husk     | Nanostructured silicon/carbon and silica/carbon nanocomposites as anode materials | 1 M LiPF <sub>6</sub> in a 1:1:1 (v/v/v) mixture of EC, EMC and DMC | Reversible capacity of 560 mAh g <sup>-1</sup> at a current density of 100 mA g <sup>-1</sup> over 180 cycles with good structural stability for silicon/carbon and 650 mAh g <sup>-1</sup> at 100 mA g <sup>-1</sup> after 150 cycles for silica/carbon nanocomposite | 116 |
| 37 | Rice husk     | Silicon/Carbon as an anode material                                               | 1 M LiPF <sub>6</sub> (mixed EC:DEC as the solvent, 50:50)          | Si/C composite displayed good cycling stability (537 mAh g <sup>-1</sup> after 200 cycles at a current density of 0.1 A g <sup>-1</sup> )                                                                                                                              | 117 |
| 38 | Rice husk     | Porous Li <sub>2</sub> MnSiO <sub>4</sub> /C nanocomposite as a cathode material  | 1 M LiPF <sub>6</sub> in a 1:1 (v/v) mixture of EC and DMC          | Discharge specific capacity of 163.2 mAh g <sup>-1</sup> at 1 C                                                                                                                                                                                                        | 118 |

|    |           |                                                                                                                   |                                                                                          |                                                                                                                                                                                                              |     |
|----|-----------|-------------------------------------------------------------------------------------------------------------------|------------------------------------------------------------------------------------------|--------------------------------------------------------------------------------------------------------------------------------------------------------------------------------------------------------------|-----|
| 39 | Rice husk | Nano-Co <sub>1-x</sub> S/biomass derived activated carbon as a cathode material                                   | 1 M LiPF <sub>6</sub> /EC + DMC (1:1 in volume)                                          | Capacity of 630 mAh g <sup>-1</sup> after 120 cycles at a current density of 0.1 A g <sup>-1</sup>                                                                                                           | 119 |
| 40 | Rice husk | Si-graphite composites as anode materials                                                                         | 1 M LiPF <sub>6</sub> solution in a mixture of EC and DEC (1:1, v/v) with 5 wt% FEC      | -                                                                                                                                                                                                            | 120 |
| 41 | Rice husk | C/SiO <sub>2</sub> composite as a cathode material                                                                | 1 M LiPF <sub>6</sub> /EC + DMC (1:1 in volume) solution                                 | Discharge specific capacity of 1105 mAh g <sup>-1</sup> at 0.1 A g <sup>-1</sup>                                                                                                                             | 121 |
| 42 | Rice husk | Fe <sub>3</sub> O <sub>4</sub> /rice husk-based macro-/mesoporous carbon bone nanocomposite as a cathode material | 1 M LiPF <sub>6</sub> dissolved in EC, DMC, and DEC (1:1:1 by volume)                    | The anode delivered an initial reversible capacity of 918 mAh g <sup>-1</sup> at 0.2 A g <sup>-1</sup> and a reversible capacity of 681 mAh g <sup>-1</sup> remained after 200 cycles at 1 A g <sup>-1</sup> | 122 |
| 43 | Rice husk | Phosphorus-carbon composite as an anode material                                                                  | 1 M LiPF <sub>6</sub> dissolved in EC, DMC, and EMC (1:1:1, v:v:v)                       | After over 100 cycles, the composite delivered a capacity of about 1293 mAh g <sup>-1</sup>                                                                                                                  | 123 |
| 44 | Rice husk | Cellulose-derived hollow carbonaceous nanospheres as anode materials                                              | 1 M LiPF <sub>6</sub> in a 1:1 (v/v) mixture of EC and DMC                               | The first discharge specific capacity of 1040 mAh g <sup>-1</sup> at a rate of 0.2 C and the reversible specific capacity stabilized at 489 mAh g <sup>-1</sup> after 100 cycles                             | 124 |
| 45 | Rice husk | SiO <sub>x</sub> /C composite as an anode material                                                                | 1 M LiPF <sub>6</sub> in a mixed solvent of EC, DMC, and EMC (1:1:8 in weight)           | Specific capacity of nearly 600 mAh g <sup>-1</sup> at 100 mA g <sup>-1</sup> after 100 cycles                                                                                                               | 125 |
| 46 | Rice husk | Rice husk-derived hierarchical silicon/N-D carbon/CNT spheres                                                     | 1 M LiPF <sub>6</sub> in a mixed solvent of EC and DMC (1:1, v:v) containing 10 vol% FEC | Reversible specific capacity of 1380 mAh g <sup>-1</sup> at a current density                                                                                                                                | 126 |

|    |           | as anode materials                                                         |                                                                                                            | of 0.5 A g <sup>-1</sup>                                                                                                   |     |
|----|-----------|----------------------------------------------------------------------------|------------------------------------------------------------------------------------------------------------|----------------------------------------------------------------------------------------------------------------------------|-----|
| 47 | Rice husk | Disordered carbon                                                          | 1 M LiPF <sub>6</sub> in a 1:1 (v/v) mixture of EC-DEC                                                     | Reversible capacity of 502 mAh g <sup>-1</sup> after 100 cycles at 0.2 C                                                   | 127 |
| 48 | Rice husk | Microsized porous SiO <sub>x</sub> @C composites as anode materials        | 1 M LiPF <sub>6</sub> /EC + DMC (1:1 in volume)                                                            | Specific capacity of 1230 mAh g <sup>-1</sup> at a current density of 0.1 A g <sup>-1</sup>                                | 128 |
| 49 | Rice husk | rGO-porous silicon composite as an anode material                          | 1 M LiPF <sub>6</sub> EC/DEC (1:1 v/v) plus 1 wt% vinylene carbonate                                       | Capacity of 907 mAh g <sup>-1</sup> at a rate of 16 A g <sup>-1</sup>                                                      | 129 |
| 50 | Rice husk | Porous silicon as anode materials                                          | 1 M LiPF <sub>6</sub> in a mixture of EC:DMC:EMC (vol ratio 1:1:1) and 1.5 wt% vinylene carbonate additive | Reversible capacity of 1400.7 mAh g <sup>-1</sup>                                                                          | 130 |
| 51 | Rice husk | Phosphorus-doped porous carbon as an anode material                        | 1 M LiPF <sub>6</sub> in a 50:50 (v/v) mixture of EC and DEC                                               | Reversible capacity of 757 mAh g <sup>-1</sup> after 100 cycles at 100 mA g <sup>-1</sup>                                  | 131 |
| 52 | Rice husk | Nb <sub>2</sub> O <sub>5</sub> /graphene nanocomposites as anode materials | 1 M LiPF <sub>6</sub> in a mixture of EC and DMC (1:1 v/v)                                                 | Reversible capacity of 192 mAh g <sup>-1</sup> under 0.1 C rate over 50 cycles                                             | 132 |
| 53 | Rice husk | V <sub>2</sub> O <sub>5</sub> NPs as cathode material                      | 1 M LiPF <sub>6</sub> in EC, DMC and EMC (1: 1: 8 by volume ratio)                                         | Discharge capacity of 229 mAh g <sup>-1</sup> after 50 cycles                                                              | 133 |
| 54 | Rice husk | Fe/Fe <sub>3</sub> O <sub>4</sub> /N-carbon composite as an anode material | 1 M LiPF <sub>6</sub> in a mixture of EC and DEC with a volume ratio of 1:1                                | Reversible capacity of about 610 mAh g <sup>-1</sup> at a current density of 200 mA g <sup>-1</sup> after 100 cycles       | 134 |
| 55 | Rice husk | Activated carbon as an anode material                                      | 1 M LiPF <sub>6</sub> in a mixture of EC and DMC (1:1 by volume)                                           | Reversible specific capacity of 730 mAh g <sup>-1</sup> at a current density of 0.2 C                                      | 135 |
| 56 | Rice husk | Carbon-silica composites as anode materials                                | 1 M LiPF <sub>6</sub> in a mixture of EC and DMC (1:1 by volume)                                           | It showed an initial discharge capacity of 325 mAh g <sup>-1</sup> , increasing to 485 mAh g <sup>-1</sup> after 84 cycles | 136 |

|    |                   |                                                                                                                                                   |                                                                               |                                                                                                                                                                                   |     |
|----|-------------------|---------------------------------------------------------------------------------------------------------------------------------------------------|-------------------------------------------------------------------------------|-----------------------------------------------------------------------------------------------------------------------------------------------------------------------------------|-----|
| 57 | Rice husk         | Rice husk-based silicon-graphene composite as an anode material                                                                                   | 1 M LiPF <sub>6</sub> in EC/DMC (1:1 v/v)                                     | Initial capacity of 1000 mAh g <sup>-1</sup> at current density of 1000 mA g <sup>-1</sup>                                                                                        | 137 |
| 58 | Rice husk         | Rice husk-derived carbon as anode materials                                                                                                       | 1 M LiPF <sub>6</sub> in a mixture of EC and DMC (1:1 v/v)                    | It delivered superior electrochemical behavior; especially rate performance (137 mAh g <sup>-1</sup> at 10 C)                                                                     | 138 |
| 59 | Rice husk         | Mesoporous silicon as an anode material                                                                                                           | 1 M LiPF <sub>6</sub> in a mixture of carbonate-containing vinylene carbonate | Reversible capacity of 1220.2 mAh g <sup>-1</sup> at a specific discharge-charge current of 1000 mA g <sup>-1</sup> after 100 cycles                                              | 139 |
| 60 | Rice husk         | Pyrolytic carbons as anode materials                                                                                                              | -                                                                             | The highest insertion and deinsertion capacities were observed with the carbon obtained from Rice husk treated with 0.3 M NaOH, at 819 and 463 mAh g <sup>-1</sup> , respectively | 140 |
| 61 | Rice husk         | Carbon anode                                                                                                                                      | 1 M LiPF <sub>6</sub> in a 50/50 v/v% mixture of EC and DEC                   | Reversible capacity of 1055 mA g <sup>-1</sup>                                                                                                                                    | 141 |
| 62 | Bagasse           | Carbon-coated Na <sub>2</sub> FePO <sub>4</sub> F as a cathode material                                                                           | 1 M LiPF <sub>6</sub> in a mixture of EC and DMC (1:1 v/v)                    | The coulombic efficiency of the cathode remained above 97.8% after 30 cycles at 0.1 C                                                                                             | 142 |
| 63 | Bagasse           | xNa <sub>3</sub> V <sub>2</sub> (PO <sub>4</sub> ) <sub>2</sub> F <sub>3</sub> ·(1-x) Na <sub>2</sub> MnPO <sub>4</sub> F@C as a cathode material | 1 M LiPF <sub>6</sub> in a mixture of EC and DMC (1:1 v/v)                    | The coulombic efficiency of the cathode remained 95% after 35 cycles at 0.1 C                                                                                                     | 143 |
| 64 | Sugarcane bagasse | HAPC/MoS <sub>2</sub> /rGO <sup>a</sup> as an anode material                                                                                      | 1 M LiPF <sub>6</sub> in EC, DMC and EMC (1: 1: 1 by volume ratio)            | Reversible discharge capacity of 952 mAh g <sup>-1</sup> after 200 cycles at a                                                                                                    | 144 |

|    |                    |                                                                                                            |                                                                               | current density of 0.2 A g <sup>-1</sup>                                                                                                                                                                                                    |     |
|----|--------------------|------------------------------------------------------------------------------------------------------------|-------------------------------------------------------------------------------|---------------------------------------------------------------------------------------------------------------------------------------------------------------------------------------------------------------------------------------------|-----|
| 65 | Bagasse            | Sulfur-doped honeycomb-like carbon as an anode material                                                    | 1.25 M MPF <sub>6</sub> (M: Li/Na) in a mixture of DEC and EC (1:1 by volume) | Reversible specific capacity of 690.9 mAh g <sup>-1</sup> at 0.1 A g <sup>-1</sup> after 100 cycles                                                                                                                                         | 145 |
| 66 | Bagasse and starch | Carbon-coated LiNi <sub>0.5</sub> Mn <sub>0.3</sub> Co <sub>0.2</sub> O <sub>2</sub> as a cathode material | 1 M LiPF <sub>6</sub> in a mixture of EC/DEC (1:1 by volume)                  | The initial discharge capacity of the LiNi <sub>0.5</sub> Mn <sub>0.3</sub> Co <sub>0.2</sub> O <sub>2</sub> was 147.8 mAh g <sup>-1</sup> , which increased to 152.4 and 153.3 mAh g <sup>-1</sup> for 2% starch and bagasse, respectively | 146 |
| 67 | Bagasse            | Hierarchically functionalized porous carbon/ $\beta$ -FeOOH composite as an anode material                 | 1 M LiPF <sub>6</sub> in EC, DMC and EMC (1: 1: 1 by volume ratio)            | Discharge capacity of 898.8 mAh g <sup>-1</sup> at 0.2 A g <sup>-1</sup> after 350 times                                                                                                                                                    | 147 |
| 68 | Bagasse            | Li <sub>4</sub> Ti <sub>5</sub> O <sub>12</sub> as an anode material                                       | 1 M LiPF <sub>6</sub> in a mixture of 1:1 volume of EC and DEC                | Reversible capacity of 170.7 mAh g <sup>-1</sup> at 1 A g <sup>-1</sup> after 1000 cycles and an excellent rate performance of 91.2 mAh g <sup>-1</sup> at 10 A g <sup>-1</sup> even after 3000 cycles                                      | 148 |
| 69 | Sugarcane bagasse  | N-D porous carbon as an anode material                                                                     | 1 M LiPF <sub>6</sub> in a mixture of EC and DEC (1:1 v/v)                    | Reversible capacity of 1148 mAh g <sup>-1</sup> at 0.1 A g <sup>-1</sup>                                                                                                                                                                    | 149 |
| 70 | Sugarcane bagasse  | Functionalized bioinspired porous carbon with graphene sheets as anode materials                           | 1 M LiPF <sub>6</sub> in a mixture of EC and DEC (1:1 v/v)                    | Reversible discharging capacity of 617.3 mAh g <sup>-1</sup> after 600 cycles at 200 mA g <sup>-1</sup>                                                                                                                                     | 150 |
| 71 | Sugarcane bagasse  | Alkali activated carbons as anode materials                                                                | -                                                                             | -                                                                                                                                                                                                                                           | 151 |

|    |                                              |                                                                             |                                                                                |                                                                                                                                                                                                                                                                                                          |     |
|----|----------------------------------------------|-----------------------------------------------------------------------------|--------------------------------------------------------------------------------|----------------------------------------------------------------------------------------------------------------------------------------------------------------------------------------------------------------------------------------------------------------------------------------------------------|-----|
| 72 | Sugarcane bagasse                            | Activated porous carbon as an anode material                                | 1 M LiPF <sub>6</sub> in a mixture (1:1, in vol %) of EC and DMC               | Reversible capacity of 757 mAh g <sup>-1</sup> at a current density of 100 mA g <sup>-1</sup>                                                                                                                                                                                                            | 152 |
| 73 | Sugarcane bagasse                            | Single-crystalline $\alpha$ -MoO <sub>3</sub> microbelts as anode materials | 1 M LiPF <sub>6</sub> in EC and DEC (1:1, v/v ratio)                           | -                                                                                                                                                                                                                                                                                                        | 153 |
| 74 | Bamboo culm, rice husk and sugarcane bagasse | 3D nanoporous Si and its nanohybrids as anode materials                     | 1 M LiPF <sub>6</sub> in EC and DMC (1:1 v/v) with 2wt% vinylene carbonate     | Si decorated with dimensionally modulated carbon-based materials such as carbon, graphene nanosheets, and multiwall CNTs, exhibited higher delithiation capacities (1997, 1290, and 1166 mAh g <sup>-1</sup> , respectively) compared to pristine Si (956 mAh g <sup>-1</sup> ) extracted from rice husk | 154 |
| 75 | Sugarcane bagasse                            | Germanium-graphene nanocomposites as anode materials                        | 1 M LiPF <sub>6</sub> in EC, DMC and DEC (1: 1: 1 by volume ratio)             | The nanocomposites exhibited high specific capacity and superior capacity retention of 90% after 15 cycles                                                                                                                                                                                               | 155 |
| 76 | Sugarcane bagasse                            | Carbonaceous materials                                                      | 1 M LiPF <sub>6</sub> in EC, DMC and DEC (Selectipur-1:1:1 m/m/m)              | Reversible specific capacity of 310 mAh g <sup>-1</sup>                                                                                                                                                                                                                                                  | 156 |
| 77 | Waste mango-peel                             | Porous hard carbon                                                          | 1 M LiPF <sub>6</sub> in EC:EMC:DMC (1:1:1 wt.%) with 1% of vinylene carbonate | Reversible discharge capacity of 801 mAh g <sup>-1</sup> at 100 mA g <sup>-1</sup>                                                                                                                                                                                                                       | 157 |
| 78 | Shaddock peel                                | N-D porous hard carbons as anode materials                                  | 1 M LiPF <sub>6</sub> in a mixture of EC, EMC and DMC (1:1:1 in volume)        | Reversible capacity of 673 mAh g <sup>-1</sup> at 50 mA g <sup>-1</sup> after 100 cycles                                                                                                                                                                                                                 | 158 |
| 79 | Lemon juice and                              | Nanosized MnO <sub>2</sub> as a cathode material                            | 1 M LiPF <sub>6</sub> in a 1:1 mixture of EC and DMC                           | Reversible capacity of 160 mAh g <sup>-1</sup> (initial                                                                                                                                                                                                                                                  | 159 |

|    |                                  |                                                                             |                                                                                    |                                                                                                                                                                |     |
|----|----------------------------------|-----------------------------------------------------------------------------|------------------------------------------------------------------------------------|----------------------------------------------------------------------------------------------------------------------------------------------------------------|-----|
|    | citrus peel                      |                                                                             |                                                                                    | capacity of 212 mAh g <sup>-1</sup> ) at a current density of 10 mA g <sup>-1</sup>                                                                            |     |
| 80 | Shaddock peel                    | Graphene-Co/CoO shaddock peel-derived carbon foam hybrid as anode materials | 1 M LiPF <sub>6</sub> in a mixture of EC, DEC, and DMC                             | Capacity of 600 mAh g <sup>-1</sup> at 0.2 A g <sup>-1</sup> after 80 times                                                                                    | 160 |
| 81 | Banana peel                      | Banana peel pseudographite as anode materials                               | 1 M LiPF <sub>6</sub> in a 1:1:1 volume ratio of EC, DEC and DMC                   | Capacity of 1090 mAh g <sup>-1</sup> at 50 mA g <sup>-1</sup>                                                                                                  | 161 |
| 82 | Spongy pomelo peel               | Carbonaceous material as an anode material                                  | 1 M LiPF <sub>6</sub> in a mixture of EC, DMC and EMC (in a volume ratio of 1:1:1) | Capacity of 452 mAh g <sup>-1</sup> at a current density of 90 mA g <sup>-1</sup> after 200 cycles                                                             | 162 |
| 83 | Wheat bran                       | Carbon anode                                                                | 1 M LiPF <sub>6</sub> in EC, EMC, and DMC (1:1:1, v/v)                             | Reversible capacity of 515 mAh g <sup>-1</sup> and corresponding retention of 92% after 1000 charge/discharge cycles                                           | 163 |
| 84 | Rice husk                        | Silicon/carbon as anode materials                                           | 1 M LiPF <sub>6</sub> in 1:1 (v/v) EC and DMC with 5 % FEC as an additive          | Reversible capacity of 1309 mAh g <sup>-1</sup> after 300 cycles                                                                                               | 164 |
| 85 | Barley husk ash                  | Porous silicon composite as anode material                                  | 1 M LiPF <sub>6</sub> in (1:1 v/v) EC:DMC                                          | Average discharge capacity of 2049 mAh g <sup>-1</sup> and 472 mAh g <sup>-1</sup> at the rate of 0.1 C and 1 C, respectively                                  | 165 |
| 86 | Sunflower stalk and walnut shell | Porous carbon microsphere as anode materials                                | 1 M LiPF <sub>6</sub> in EC and DEC (1:1 vol%)                                     | The capacity of the carbon microsphere originating from Sunflower stalk and walnut shell are 145.9 and 235.3 mAh g <sup>-1</sup> after 50 cycles, respectively | 166 |
| 87 | Shaddock peel                    | SiO <sub>x</sub> -modified porous biocarbon as an anode material            | 1 M LiPF <sub>6</sub> in a mixture of EC, DMC and EMC (1:1:1 w/w)                  | Reversible capacity of 740 mAh g <sup>-1</sup> at a current density of 0.358                                                                                   | 167 |

|    |                                                                                                                                |                                                                               |                                                                                                                                                  | A·g <sup>-1</sup> after 100 cycles                                                                                              |     |
|----|--------------------------------------------------------------------------------------------------------------------------------|-------------------------------------------------------------------------------|--------------------------------------------------------------------------------------------------------------------------------------------------|---------------------------------------------------------------------------------------------------------------------------------|-----|
| 88 | Coffee beans                                                                                                                   | $\alpha$ -Fe <sub>2</sub> O <sub>3</sub> nano coffee beans as anode materials | 1 M LiPF <sub>6</sub> in EC/DMC (1:1 v%)                                                                                                         | Reversible capacity of 810 mAh g <sup>-1</sup> (0.2 C)                                                                          | 168 |
| 89 | Broad bean shells                                                                                                              | Sulfur and nitrogen dual-doping porous carbon materials as anode materials    | 1 M LiPF <sub>6</sub> in EC and DMC with a volume ratio of 1:1                                                                                   | -                                                                                                                               | 169 |
| 90 | Soya bean seed ( <i>Glysin maze</i> ), Bagasse fibers ( <i>Sacharum officinarum</i> ) and Semer Cotton ( <i>Bombax ceiba</i> ) | Carbon anode                                                                  | LiPF <sub>6</sub> (1 wt.%) in EC:DMC (1:20 solution)                                                                                             | Bagasse is the best precursor                                                                                                   | 170 |
| 91 | Coffee bean                                                                                                                    | Carbon anodes                                                                 | 1 M LiPF <sub>6</sub> in 1:1 EC and DMC for mesocarbon microbead cells and in 1:1 propylene carbonate and DMC for non-graphitizable carbon cells | -                                                                                                                               | 171 |
| 92 | Wheat straw                                                                                                                    | Hierarchical nitrogen-rich porous carbon (HNPC) as an anode material          | -                                                                                                                                                | Initial reversible capacity of 792.41 mAh g <sup>-1</sup> with coulombic efficiency of 88.61%                                   | 172 |
| 93 | Wheat straw                                                                                                                    | SnO <sub>2</sub> /C as an anode material                                      | 1 M LiPF <sub>6</sub> /EC:DMC:EMC (1:1:1 in volume)                                                                                              | Initial capacity of 517.6 mAh g <sup>-1</sup> and a capacity ratio of 52.9% at 0.05 C (80 mA g <sup>-1</sup> ) after 100 cycles | 173 |
| 94 | Wheat                                                                                                                          | Few-layer graphene as                                                         | 1 M LiPF <sub>6</sub> in EC/DMC (1:1                                                                                                             | Reversible capacity of                                                                                                          | 174 |



|    |             |                                                                 |                                                |                                                                                                                                                                                                               |                |
|----|-------------|-----------------------------------------------------------------|------------------------------------------------|---------------------------------------------------------------------------------------------------------------------------------------------------------------------------------------------------------------|----------------|
|    | straw       | an anode material                                               | by volume)                                     | 502 mAh g <sup>-1</sup> at 0.1 C, rate capability of 463.5, 431.4, and 306.8 mAh g <sup>-1</sup> at 1, 2, and 5 C, respectively, and cycling performance of 392.8 mAh g <sup>-1</sup> at 1 C after 300 cycles |                |
| 95 | Wheat straw | Hierarchically porous nitrogen-rich carbon as an anode material | -                                              | Specific capacity of 1470 mAh g <sup>-1</sup> at 0.037 A g <sup>-1</sup>                                                                                                                                      | <sup>175</sup> |
| 96 | Rice husk   | Hierarchically porous carbons                                   | 1 M LiPF <sub>6</sub> in EC and DEC (1:1, v/v) | Specific capacity of 541 mAh g <sup>-1</sup> after 800 cycles at 1 A g <sup>-1</sup>                                                                                                                          | <sup>176</sup> |

<sup>a</sup> 3D aerogels based on the in-situ growth of tetragonal molybdenum disulfide (1T-MoS<sub>2</sub>) on hydrothermally acid-treated porous carbon (HAPC) derived from sugarcane bagasse and rGO composites.

**Table S5.** Agricultural wastes-derived carbon for lithium-sulfur batteries (Li-SBs).

| Entry | Source                      | Li-SBs applications                                                                                                 | Highlights                                                                                                                                                                                                                                                            | Ref. |
|-------|-----------------------------|---------------------------------------------------------------------------------------------------------------------|-----------------------------------------------------------------------------------------------------------------------------------------------------------------------------------------------------------------------------------------------------------------------|------|
| 1     | Snake skin fruit peel (SFP) | The synthesized porous carbon using SFP applied as cathode along with sulfur (Carbon-S)                             | Carbon-sulfur electrodes demonstrated initial specific capacity of 945 mAh g <sup>-1</sup> and good capacity retention until the 100 <sup>th</sup> cycle at 0.1 C rate                                                                                                | 177  |
| 2     | Bagasse                     | S/Bagasse-based 3D carbon matrix (BC) used as a cathode                                                             | S/BC cathode delivered specific capacity of 1360 mAh g <sup>-1</sup> at 0.2 C and remained at 790 mAh g <sup>-1</sup> after 200 cycles                                                                                                                                | 178  |
| 3     | Pomelo peel                 | N-D porous carbon-derived pomelo peel used as an advanced sulfur host for the improvement of Li-SBs performance     | The sulfur composite electrodes displayed an ultrahigh initial capacity of 1534.6 mAh g <sup>-1</sup> , high coulombic efficiency of over 98% upon 300 cycles, and decent rate capability of up to 2 C                                                                | 179  |
| 4     | Rice husk                   | Rice husks-derived hierarchical porous SiO <sub>2</sub> @C-2.5S used as a cathode                                   | SiO <sub>2</sub> @C-2.5S cathode delivered high reversible capacity of 1218 mAh g <sup>-1</sup> at 0.2 C, superior rate capability of 553 mAh g <sup>-1</sup> at 2 C and outstanding cycling stability with a low capacity fading of 0.104% after 300 cycles at 0.5 C | 180  |
| 5     | Garlic peel                 | The porous carbon synthesized using hydrothermal treatment (GPC/HT) applied as cathode along with sulfur (GPC/HT-S) | The GPC/HT-S with a sulfur content of 87.6 wt.% demonstrated high initial specific capacity of 1087 mAh g <sup>-1</sup> at 0.1 C and good cycle retention of 72.2% after 400 cycles at 0.5 C                                                                          | 181  |
| 6     | Corn husk                   | Co/3D carbon/rGO decorated pomelo peel separator applied in Li-SBs with 3DC/S as a cathode                          | Stable reversible capacity of 516.3 mAh g <sup>-1</sup> after 500 cycles                                                                                                                                                                                              | 182  |
| 7     | Rice husk                   | Rice husk-derived SiO <sub>x</sub> @carbon nanocomposites used as cathodes                                          | The composite showed high capacity and good stability (675 mAh g <sup>-1</sup> after 100 cycles at 0.1 C                                                                                                                                                              | 183  |

**Table S6.** Different agriculture wastes for DSSCs applications.

| Entry | Source                                                                                                                                                                                            | DSSCs applications         | Highlights                                                                                                                                                                                                                              | Ref. |
|-------|---------------------------------------------------------------------------------------------------------------------------------------------------------------------------------------------------|----------------------------|-----------------------------------------------------------------------------------------------------------------------------------------------------------------------------------------------------------------------------------------|------|
| 1     | Spinach, pitaya pericarp, orange peel, ginkgo leaf, purple cabbage and carrot                                                                                                                     | Dyes sensitizers           | Higher and lower conversion efficiencies of 0.157 and 0.01% were obtained using purple cabbage and carrot, respectively                                                                                                                 | 184  |
| 2     | <i>Acanthus sennii chiovenda</i> flower and <i>Euphorbia cotinifolia</i> leaf                                                                                                                     | Light harvesting pigments  | -                                                                                                                                                                                                                                       | 185  |
| 3     | Red dragon fruit peel                                                                                                                                                                             | Natural sensitizer         | Open Circuit-Voltage = 0.47 V, Jsc = 23.46 $\mu\text{Acm}^{-2}$ , fill factor = 0.480 and efficiency of 0.029%                                                                                                                          | 186  |
| 4     | Cochineal, papaya peel, and the microalga <i>Scenedesmus obliquus</i>                                                                                                                             | Natural sensitizer         | The high efficiencies of 0.228, 0.093 and 0.064% were achieved using cochineal, papaya peel extract and <i>Scenedesmus obliquus</i> extract, respectively                                                                               | 187  |
| 5     | Pomelo peel                                                                                                                                                                                       | Counter electrode catalyst | -                                                                                                                                                                                                                                       | 188  |
| 6     | Guar Gum                                                                                                                                                                                          | Polymer gel electrolyte    | Power conversion efficiency of 4.96%                                                                                                                                                                                                    | 189  |
| 7     | Peels of <i>Musa paradisiaca</i> , <i>Mangifera indica</i> , <i>Punica granatum</i> , and <i>Ananas comosus</i>                                                                                   | Photosensitizer            | Solar to electrical energy efficiencies of natural dye-based on ZnO DSSCs for <i>Musa paradisiaca</i> , <i>Mangifera indica</i> , <i>Punica granatum</i> , and <i>Ananas comosus</i> were 0.009, 0.024, 0.010, and 0.002%, respectively | 190  |
| 8     | Red grape peel ( <i>Vitis Vinifera</i> ), jengkol peel ( <i>Pithecellobium jiringa</i> ), senduduk fruit ( <i>Melastoma malabathricum</i> L), and mangosteen peel ( <i>Garcinia Mangostana</i> L) | Natural dye co-pigmented   | The highest efficiency in DSSC was obtained using $\text{TiO}_2$ -Ag and mangosteen peel as the dye source                                                                                                                              | 191  |
| 9     | Onion peel                                                                                                                                                                                        | Natural sensitizer         | $\eta = 0.0413\%$ , Jsc = 0.6031 $\text{mAcm}^{-2}$                                                                                                                                                                                     | 192  |

|    |                                                                                           |                                         |                                                                                                                                                                                                                |     |
|----|-------------------------------------------------------------------------------------------|-----------------------------------------|----------------------------------------------------------------------------------------------------------------------------------------------------------------------------------------------------------------|-----|
|    |                                                                                           |                                         | and fill factor of 0.2764                                                                                                                                                                                      |     |
| 10 | A mixture of waste orange-apple peels                                                     | Counter electrode (Se@activated carbon) | The DSSC with a Se@activated carbon-based composite (synthesized <i>via</i> Se incorporation on the porous activated carbon derived from fruit peel wastes) counter electrode of 5.67% PCE with long stability | 193 |
| 11 | Limonene extracted from orange peel                                                       | Additive                                | $\eta = 4.4\%$ , $J_{sc} = 8.94 \text{ mAcm}^{-2}$ , Open Circuit-Voltage = 887 mV, fill factor of 0.55% and efficiency of 4.4%                                                                                | 194 |
| 12 | Cornelian cherry, black pomegranate, ruby grape, and tangerine peel                       | Photosensitizer                         | -                                                                                                                                                                                                              | 195 |
| 13 | <i>Rhamnus tinctoria</i> seed, <i>Rubia fruticosa</i> fruits, and <i>Pinus pinea</i> bark | Natural sensitizer                      | -                                                                                                                                                                                                              | 196 |
| 14 | <i>Mussaenda erythrophylla</i>                                                            | Natural sensitizer                      | -                                                                                                                                                                                                              | 197 |

## References

- 1 L. Shi, T. Wu, Y. Wang, J. Zhang, G. Wang, J. Zhang, B. Dai and F. Yu, *Materials*, 2017, **10**(9), 1030.
- 2 D. Kong, W. Yuan, C. Li, J. Song, A. Xie and Y. Shen, *Appl. Surf. Sci.*, 2017, **393**, 144–150.
- 3 S. T. Senthilkumar, S. O. Park, J. Kim, S. M. Hwang, S. K. Kwak and Y. Kim, *J. Mater. Chem. A*, 2017, **5**, 14174–14181.
- 4 Y. Wang, M. Zhu, G. Wang, B. Dai, F. Yu, Z. Tian and X. Guo, *Nanomaterials*, 2017, **7**(11), 404.
- 5 Z. Zha, Z. Zhang, P. Xiang, H. Zhu, X. Shi and S. Chen, *Sci. Total Environ.*, 2021, **764**, 142918.
- 6 S. Gao, L. Li, K. Geng, X. Wei and S. Zhang, *Nano Energy*, 2015, **16**, 408–418.
- 7 B. Sravani, P. Raghavendra, Y. Chandrasekhar, Y. V. M. Reddy, R. Sivasubramanian, K. Venkateswarlu, G. Madhavi and L. S. Sarma, *Int. J. Hydrogen Energy*, 2020, **45**(13), 7680–7690.
- 8 W. Yuan, A. Xie, S. Li, F. Huang, P. Zhang and Y. Shen, *Energy*, 2016, **115**(Part 1), 397–403.
- 9 W. Yuan, Y. Feng, A. Xie, X. Zhang, F. Huang, S. Li, X. Zhang and Y. Shen, *Nanoscale*, 2016, **8**, 8704–8711.
- 10 P. Roy, R. Ravindranath, A. P. Periasamy, C.-W. Lien, C.-T. Liang and H.-T. Chang, *RSC Adv.*, 2016, **6**, 108941–108947.
- 11 T. Feng, W. Liao, Z. Li, L. Sun, D. Shi, C. Guo, Y. Huang, Y. Wang, J. Cheng, Y. Li and Q. Diao, *Nanoscale Res. Lett.*, 2017, **12**, 595.
- 12 N. Wang, T. Li, Y. Song, J. Liu and F. Wang, *Carbon*, 2018, **130**, 692–700.
- 13 J. Wang, H. Zhao, Y. Gao, D. Chen, C. Chen, M. Saccoccio and F. Ciucci, *Int. J. Hydrogen Energy*, 2016, **41**(25), 10744–10754.
- 14 Y. Zhang, F. Wen, M. Zhu, Z. Zhou, J. Tan and H. Wang, *Mater. Chem. Phys.*, 2018, **220**, 299–307.
- 15 X. Cao, Z. Li, H. Chen, C. Zhang, Y. Zhang, C. Gu, X. Xu and Q. Li, *Int. J. Hydrogen Energy*, 2021, **46**(36), 18887–18897.
- 16 S. Jing, Y. Zhang, F. Chen, H. Liang, S. Yin and P. Tsiakaras, *Appl. Catal. B Environ.*, 2019, **245**, 721–732.
- 17 Z. Yang, R. Yang, G. Dong, M. Xiang, J. Hui, J. Ou and H. Qin, *ACS Omega*, 2021, **6**(3), 2066–2073.
- 18 F. He, Y. Wang, M. Zhong, X. Feng, B. Su and Z. Lei, *J. Environ. Chem. Eng.*, 2021, **9**(6), 106894.

- 19 W. Chen, W. Lan, H. Wang, A. Zhang and C. Liu, *Electrochim. Acta*, 2022, **404**, 139578.
- 20 X. Fuku, M. Modibedi, N. Matinise, P. Mokoena, N. Xaba and M. Mathe, *J. Colloid Interface Sci.*, 2019, **545**, 138–152.
- 21 Z. Wang, P. Zheng and J. Guo, *Appl. Phys. A*, 2021, **127**, 323.
- 22 L. Yang, H. Zheng, L. Liu, W. Wu and S. Wang, *Results Chem.*, 2021, **3**, 100109.
- 23 P. Zhang, J. Mu, Z. Guo, S. I. Wong, J. Sunarso, Y. Zhao, W. Xing, J. Zhou and S. Zhuo, *ChemElectroChem*, 2021, **8**, 1196–1203.
- 24 J. Li, F. Luo, T. Lin, J. Yang, S. Yang, D. He, D. Xiao and W. Liu, *Chem. Phys. Lett.*, 2020, **753**, 137597.
- 25 L. Wan, D. Chen, J. Liu, Y. Zhang, J. Chen, C. Du and M. Xie, *J. Alloys Compd.*, 2020, **823**, 153747.
- 26 G. Gou, F. Huang, M. Jiang, J. Li and Z. Zhou, *Renew. Energy*, 2020, **149**, 208–216.
- 27 Z. Xu, X. Zhang, Y. Liang, H. Lin, S. Zhang, J. Liu, C. Jin, U. Choe and K. Sheng, *Energy Fuels*, 2020, **34**(7), 8966–8976.
- 28 S. Liu, X. Hu, J. Ma, M. Li, H. Lin and S. Han, *Energy Fuels*, 2020, **34**(11), 14948–14957.
- 29 M. Yeleuov, C. Seidl, T. Temirgaliyeva, A. Taurbekov, N. Prikhodko, B. Lesbayev, F. Sultanov, C. Daulbayev and S. Kumekov, *Energies*, 2020, **13**(8), 4943.
- 30 W. Chen, X. Wang, C. Liu, M. Luo, P. Yang and X. Zhou, *Waste Manag.*, 2020, **102**, 330–339.
- 31 F. Ding, J. Li, H. Du, J. Zhao, K. Qu, Y. Li, X. Zhang, Y. Zhang, Y. Qin and W. Y. Lu, *Int. J. Electrochem. Sci.*, 2020, **15**(6), 5632–5649.
- 32 Y. Qu, L. Liu, L. Li, S. Wen, D. Wei, N. Xiao, F. Yan, J. Yu and L. Wang, *Int. J. Electrochem. Sci.*, 2020, **15**(3), 2399–2413.
- 33 H. Shen, X. Xia, Y. Ouyang, X. Jiao, S. Mutahir, D. Mandler and Q. Hao, *ChemElectroChem*, 2019, **6**(14), 3599–3605.
- 34 V. Yang, R. A. Senthil, J. Pan, A. Khan, S. Osman, L. Wang, W. Jiang and Y. Sun, *J. Electroanal. Chem.*, 2019, **855**, 113616.
- 35 E. Taer, R. Taslim, A. W. Putri, A. Apriwandi and A. Agustino, *Int. J. Electrochem. Sci.*, 2018, **13**(12), 12072–12084.
- 36 M. V Lebedeva, A. B. Ayupov, P. M. Yeletsky and V. N. Parmon, *Int. J. Electrochem. Sci.*, 2018, **13**, 3674–3690.
- 37 S. Sankar, H. Lee, H. Jung, A. Kim, A. T. A. Ahmed, A. I. Inamdar, H. Kim, S. Lee, H. Im and D. Y. Kim, *New J. Chem.*, 2017, **41**, 13792–13797.
- 38 K. Sun, J. Li, H. Peng, E. Feng, G. Ma and Z. Lei, *Ionics*, 2017, **23**, 985–996.
- 39 X. He, H. Zhang, K. Xie, Y. Xia, Z. Zhao and X. Wang, *J. Nanosci. Nanotechnol.*, 2016,

- 16(3), 2841–2846.
- 40 B. Liu, L. Zhang, P. Qi, M. Zhu, G. Wang, Y. Ma, X. Guo, H. Chen, B. Zhang, Z. Zhao, B. Dai and F. Yu, *Nanomaterials*, 2016, **6**(1), 18.
- 41 C. Rong, S. Chen, J. Han, K. Zhang, D. Wang, X. Mi and X. Wei, *J. Renew. Sustain. Energy*, 2015, **7**, 023104.
- 42 M.-B. Wu, L.-Y. Li, J. Liu, Y. Li, P.-P. Ai, W.-T. Wu and J.-T. Zheng, *New Carbon Mater.*, 2015, **30**(5), 471–475.
- 43 H. Xu, B. Gao, H. Cao, X. Chen, L. Yu, K. Wu, L. Sun, X. Peng and J. Fu, *J. Nanomater.*, 2014, **2014**, 714010.
- 44 V. Gehrke, G. K. Maron, L. da Silva Rodrigues, J. H. Alano, C. M. P. de Pereira, M. O. Orlandi and N. L. V. Carreño, *Mater. Today Commun.*, 2021, **26**, 101779.
- 45 D. Gandla, X. Wu, F. Zhang, C. Wu and D. Q. Tan, *ACS Omega*, 2021, **6**(11), 7615–7625.
- 46 Y. Iradukunda, G. Wang, X. Li, G. Shi, A. I. M. Albashir, L. Dusengemungu, Y. Hu, F. Luo, K. Yi, X. Niu and Z. Wu, *J. Electroanal. Chem.*, 2021, **890**, 115228.
- 47 D. Khalafallah, X. Quan, C. Ouyang, M. Zhi and Z. Hong, *Renew. Energy*, 2021, **170**, 60–71.
- 48 G. Li, F. Yang, L. Wu, L. Qian, X. Hu, Z. Wang and W. Chen, *New J. Chem.*, 2021, **45**, 10432–10447.
- 49 E. Taer, F. Febriyanti, W. S. Mustika, R. Taslim, A. Agustino and A. Apriwandi, *Carbon Lett.*, 2021, **31**, 601–612.
- 50 R. J. Wesley, A. Durairaj, S. Ramanathan, A. Obadiah, R. Justinabraham, X. Lv and S. Vasanthkumar, *Diam. Relat. Mater.*, 2021, **115**, 108360.
- 51 M. S. Raghu, L. Parashuram, K. Y. Kumar, B. P. Prasanna, S. Rao, P. Krishnaiah, K. N. Prashanth, C. B. P. Kumar and H. Alrobei, *Mater. Today Commun.*, 2020, **24**, 101033.
- 52 K. Surya and M. S. Michael, *J. Electroanal. Chem.*, 2020, **878**, 114674.
- 53 Z. Teng, K. Han, J. Li, Y. Gao, M. Li and T. Ji, *Ultrason. Sonochem.*, 2020, **60**, 104756.
- 54 C.-Y. Xiao, W.-L. Zhang, H.-B. Lin, Y.-X. Tian, X.-X. Li, Y.-Y. Tian and H.-Y. Lu, *New Carbon Mater.*, 2019, **34**(4), 341–348.
- 55 M. Song, Y. Zhou, X. Ren, J. Wan, Y. Du, G. Wu and F. Ma, *J. Colloid Interface Sci.*, 2019, **535**, 276–286.
- 56 G. Shi, Y. Dong, G. Wang, X. Jiang, C. Liu, S. Jia, P. Zhang and H. Ma, *Int. J. Electrochem. Sci.*, 2019, **14**(4), 4020-4031.
- 57 L. Qiang, Z. Hu, Z. Li, Y. Yang, X. Wang, Y. Zhou, X. Zhang, W. Wang and Q. Wang, *J. Porous Mater.*, 2019, **26**, 1217–1225.
- 58 J. Praneeraj, K. Neungnoraj, I. In and P. Paoprasert, *Key Eng. Mater.*, 2019, **803**, 115–119.

- 59 N. Parveen, A. I. Al-Jaafari and J. I. Han, *Electrochim. Acta*, 2019, **293**, 84–96.
- 60 Y. Liu, Z. Chang, L. Yao, S. Yan, J. Lin, J. Chen, J. Lian, H. Lin and S. Han, *J. Electroanal. Chem.*, 2019, **847**, 113111.
- 61 D. Liu, W. Zhang and W. Huang, *Chin. Chem. Lett.*, 2019, **30**(6), 1315–1319.
- 62 C. Li, P. He, L. Jia, X. Zhang, T. Zhang, F. Dong, M. He, S. Wang, L. Zhou, T. Yang, and H. Liu, *Electrochim. Acta*, 2019, **299**, 253–261.
- 63 J. Li, J. Wang, K. Han, J. Qi, M. Li, Z. Teng and M. Wang, *Int. J. Electrochem. Sci.*, 2019, **14**(11), 10289–10305.
- 64 C.-K. Sim, S. R. Majid and N. Z. Mahmood, *J. Alloys Compd.*, 2019, **803**, 424–433.
- 65 H. Wang, D. Wu and J. Zhou, *J. Alloys Compd.*, 2019, **811**, 152073.
- 66 S. Deshagani, K. Krushnamurthy and M. Deepa, *Mater. Today Energy*, 2018, **9**, 137–153.
- 67 C. Li, D. He, Z.-H. Huang and M.-X. Wang, *J. Electrochem. Soc.*, 2018, **165**(14), A3334.
- 68 G. Fu, Q. Li, J. Ye, J. Han, J. Wang, L. Zhai and Y. Zhu, *J. Mater. Sci. Mater. Electron.*, 2018, **29**, 7707–7717.
- 69 Q. Wang, M. Zhou, Y. Zhang, M. Liu, W. Xiong and S. Liu, *J. Mater. Sci. Mater. Electron.*, 2018, **29**, 4294–4300.
- 70 H. Wang, D. Wu, J. Zhou, H. Ma, D. Xu, B. Qian, S. Tao and Z. Wang, *BioResources*, 2018, **13**(2), 4279–4289.
- 71 G. Yang and S.-J. Park, *J. Alloys Compd.*, 2018, **741**, 360–367.
- 72 S. Zhang, Y. Pang, Y. Wang, B. Dong, S. Lu, M. Li and S. Ding, *J. Alloys Compd.*, 2018, **735**, 1722–1729.
- 73 K. M. Horax, S. Bao, M. Wang and Y. Li, *Chin. Chem. Lett.*, 2017, **28**(12), 2290–2294.
- 74 Y. Huang, J. He, Y. Luan, Y. Jiang, S. Guo, X. Zhang, C. Tian and B. Jiang, *RSC Adv.*, 2017, **7**, 10385–10390.
- 75 E. Li, R. Liu, S. Huang, J. Mei, J. Xu and G. Yuan, *Synth. Met.*, 2017, **226**, 104–112.
- 76 J. Li, W. Liu, D. Xiao and X. Wang, *Appl. Surf. Sci.*, 2017, **416**, 918–924.
- 77 L. Jiyuan, Z. Jinxing, L. Yuxiao, L. Kuan-Ting, L. Chang, L. Huan, C. Qi, L. Qian, W. Lingfang, T. Shun, A. Liang and C. Yuan-Cheng, *J. Taiwan Inst. Chem. Eng.*, 2017, **81**, 383–390.
- 78 S. Zhang, J. Liu, P. Huang, H. Wang, C. Cao and W. Song, *Sci. Bull.*, 2017, **62**(12), 841–845.
- 79 Y.-Y. Wang, B.-H. Hou, H.-Y. Lü, C.-L. Lü and X.-L. Wu, *ChemistrySelect*, 2016, **1**(7), 1441–1447.
- 80 G. Qu, S. Jia, H. Wang, F. Cao, L. Li, C. Qing, D. Sun, B. Wang, Y. Tang and J. Wang, *ACS*



- Appl. Mater. Interfaces*, 2016, **8**(32), 20822–20830.
- 81 Z. Wang, B. Zheng, H. Liu, C. Zhang, F. Wu, H. Luo and P. Yu, *J. Alloys Compd.*, 2021, **861**, 157955.
- 82 Y. Li, L. Liu, X. Liu, Y. Feng, B. Xue, L. Yu, L. Ma, Y. Zhu, Y. Chao and X. Wang, *Mater. Chem. Phys.*, 2021, **262**, 124331.
- 83 L. Liao, T. Ma, Y. Xiao, M. Wang, Y. Gao and T. Fang, *J. Alloys Compd.*, 2021, **873**, 159700.
- 84 C.-H. Zheng, G.-P. Zhang, S.-S. Wang, A.-Q. Mao and D.-L. Fang, *J. Alloys Compd.*, 2021, **875**, 159974.
- 85 Q. Ma, Y. Dai, H. Wang, G. Ma, H. Guo, X. Zeng, N. Tu, X. Wu and M. Xiao, *Chin. Chem. Lett.*, 2021, **32**(1), 5–8.
- 86 X. Guo, W. Li, P. Geng, Q. Zhang, H. Pang and Q. Xu, *J. Colloid Interface Sci.*, 2022, **606**(Part 1), 784–792.
- 87 L. Ma, L. Liu, X. Liu, Y. Li, Y. Feng, Y. Tian, Y. Chao, Y. Zhu and X. Wang, *J. Electron. Mater.*, 2021, **50**(8), 4426–4432.
- 88 J. Cui, H. Zhang, Y. Liu, S. Li, W. He, J. Hu and J. Sun, *Electrochim. Acta*, 2020, **334**, 135619.
- 89 Y. Feng, L. Liu, X. Liu, Y. Teng, Y. Li, Y. Guo, Y. Zhu, X. Wang and Y. Chao, *Electrochim. Acta*, 2020, **359**, 136933.
- 90 V. Laokawee, T. Autthawong, B. Chayasombat, A. Yu and T. Sarakonsri, *Solid State Phenom.*, 2020, **302**, 51–61.
- 91 T. Autthawong, O. Namsar, A. Yu and T. Sarakonsri, *J. Mater. Sci. Mater. Electron.*, 2020, **31**, 9126–9132.
- 92 J. Song, S. Guo, D. Ren, H. Liu, L. Kou, J. Su and P. Zheng, *Ceram. Int.*, 2020, **46**(8), 11570–11576.
- 93 S. Liang, K. Yu, Y. Li and C. Liang, *Mater. Res. Express*, 2020, **7**(1), 15021.
- 94 K. Yu, T. Liu, Q. Zheng, X. Wang, W. Liu, J. Liang and C. Liang, *J. Porous Mater.*, 2020, **27**, 875–882.
- 95 Y. Guo, X. Chen, W. Liu, X. Wang, Y. Feng, Y. Li, L. Ma, B. Di and Y. Tian, *J. Electron. Mater.*, 2020, **49**, 1081–1089.
- 96 J. Shi, N. Lin, D. Liu, Y. Wang and H. Lin, *J. Electroanal. Chem.*, 2020, **857**, 113634.
- 97 H. Zhang, K. Liu, Y. Liu, Z. Lang, W. He, L. Ma, J. Man, G. Jia, J. Cui and J. Sun, *J. Power Sources*, 2020, **447**, 227400.
- 98 J. Song, S. Guo, L. Kou, H. Liu, K. Kajiyoshi, J. Su and P. Zheng, *J. Mater. Sci. Mater. Electron.*, 2020, **31**, 16037–16043.

- 99 K. Yu, Y. Wang, X. Wang, W. Liu, J. Liang and C. Liang, *Mater. Lett.*, 2019, **253**, 405–408.
- 100 Y. Li, X. Liu, L. Liu, W. Liu, Y. Feng, Y. Guo, Y. Zhu, J. Wang and X. Wang, *J. Electrochem. Soc.*, 2019, **166**(12), A2425.
- 101 W. An, B. Xiang, J. Fu, S. Mei, S. Guo, K. Huo, X. Zhang, B. Gao and P. K. Chu, *Appl. Surf. Sci.*, 2019, **479**, 896–902.
- 102 K. Yu, L. Wang, X. Wang, W. Liu, J. Liang and C. Liang, *J. Phys. Chem. Solids*, 2019, **135**, 109112.
- 103 I. Kurmanbayeva, A. Mentbayeva, A. Sadykova, A. Adi, Z. Mansurov and Z. Bakenov, *Eurasian Chem.-Technol. J.*, 2019, **21**, 75–81.
- 104 X. Fan, B. Yin, T. Wu, M. Feng, G. C. Zhang, S. Li, S. Tang, J. Gu, B. Wen and L. Lu, *Energy Technol.*, 2019, **7**(6), 1800787.
- 105 Y. Li, Y. Huang, K. Song, X. Wang, K. Yu and C. Liang, *ChemistrySelect*, 2019, **4**(14), 4178–4184.
- 106 X. Zhang, Y. Li, D. Li, J. Xiao, W. Zhang and Y. Xu, *Int. J. Hydrogen Energy*, 2019, **44**(14), 7438–7447.
- 107 S. Sekar, A. T. Aqueel Ahmed, A. I. Inamdar, Y. Lee, H. Im, D. Y. Kim and S. Lee, *Nanomaterials*, 2019, **9**(7), 1055.
- 108 Z. Guo, Y. Zhao, Y. Cai, P. Hou, L. Zhao, B. Wang, B. Liu and Y. Wei, *Mater. Res. Express*, 2019, **6**(4), 045505.
- 109 V. Laokawee, N. Jarulertwathana, T. Autthawong, T. Masuda, Y. Chimupala, S. Chaiklangmuang and T. Sarakonsri, *Solid State Phenom.*, 2018, **283**, 46–54.
- 110 K. Yu, J. Li, H. Qi and C. Liang, *Diam. Relat. Mater.*, 2018, **86**, 139–145.
- 111 T. Autthawong, B. Chayasombat, V. Laokawee, N. Jarulertwathana, T. Masuda and T. Sarakonsri, *Solid State Phenom.*, 2018, **283**, 37–45.
- 112 K. Yu, H. Zhang, H. Qi, J. Liang and C. Liang, *New J. Chem.*, 2018, **42**, 19811–19817.
- 113 Y. Li, Y. Gao, H. Qi, K. Yu and C. Liang, *RSC Adv.*, 2018, **8**, 33019–33024.
- 114 O. Kamon In, S. Srilomsak and N. Meethong, *Key Eng. Mater.*, 2018, **766**, 51–57.
- 115 Y. Feng, X. Liu, L. Liu, Z. Zhang, Y. Teng, D. Yu, J. Sui and X. Wang, *ChemistrySelect*, 2018, **3**(37), 10338–10344.
- 116 H. Chu, Q. Wu and J. Huang, *Colloids Surf. A Physicochem. Eng. Asp.*, 2018, **558**, 495–503.
- 117 K. Yu, H. Zhang, H. Qi, X. Gao, J. Liang and C. Liang, *ChemistrySelect*, 2018, **3**(19), 5439–5444.
- 118 Y. Li, X. Li, H. Qi, K. Yu and Y. Dou, *ChemistrySelect*, 2018, **3**(16), 4244–4251.
- 119 J. Lin, J. Cui, F. Cheng, Y. Cui, H. Sun and J. Sun, *J. Alloys Compd.*, 2017, **695**, 2173–2179.

- 120 H. J. Kim, J. H. Choi and J. W. Choi, *Nano Converg.*, 2017, **4**, 24.
- 121 J. Cui, F. Cheng, J. Lin, J. Yang, K. Jiang, Z. Wen and J. Sun, *Powder Technol.*, 2017, **311**, 1–8.
- 122 X. Fan, S. Li, Y. Cui, L. Lu, C. Zhou and Z. Liu, *J. Solid State Electrochem.*, 2017, **21**, 27–34.
- 123 J. Li, L. Wang, Z. Wang, G. Tian and X. He, *ACS omega*, 2017, **2**, 4440–4446.
- 124 K. Yu, J. Li, H. Qi and C. Liang, *ChemistrySelect*, 2017, **2**(13), 3627–3632.
- 125 Y. Ju, J. A. Tang, K. Zhu, Y. Meng, C. Wang, G. Chen, Y. Wei and Y. Gao, *Electrochim. Acta*, 2016, **191**, 411–416.
- 126 Y.-C. Zhang, Y. You, S. Xin, Y.-X. Yin, J. Zhang, P. Wang, X.-S. Zheng, F.-F. Cao and Y.-G. Guo, *Nano Energy*, 2016, **25**, 120–127.
- 127 Y. Li, F. Wang, J. Liang, X. Hu and K. Yu, *New J. Chem.*, 2016, **40**, 325–329.
- 128 J. Cui, Y. Cui, S. Li, H. Sun, Z. Wen and J. Sun, *ACS Appl. Mater. Interfaces*, 2016, **8**(44), 30239–30247.
- 129 L.-S. Jiao, J.-Y. Liu, H.-Y. Li, T.-S. Wu, F. Li, H.-Y. Wang and L. Niu, *J. Power Sources*, 2016, **315**, 9–15.
- 130 S. Liu, B. Liu, Y. Yao, P. Dong and S. Zhao, *J. Wuhan Univ. Technol. Sci. Ed.*, 2016, **31**, 965–971.
- 131 J. Wang, Z. Yang, F. Pan, X. Zhong, X. Liu, L. Gu and Y. Yu, *Rsc Adv.*, 2015, **5**, 55136–55142.
- 132 P. Arunkumar, A. G. Ashish, B. Babu, S. Sarang, A. Suresh, C. H. Sharma, M. Thalukulam and M. M. Shaijumon, *RSC Adv.*, 2015, **5**, 59997–60004.
- 133 K. Zhu, Y. Meng, H. Qiu, Y. Gao, C. Wang, F. Du, Y. Wei and G. Chen, *J. Alloys Compd.*, 2015, **650**, 370–373.
- 134 Y. Li, Q. Meng, S. Zhu, Z. Sun, H. Yang, Z. Chen, C. Zhu, Z. Guo and D. Zhang, *Dalt. Trans.*, 2015, **44**, 4594–4600.
- 135 X. Peng, J. Fu, C. Zhang, J. Tao, L. Sun and P. K. Chu, *Nanosci. Nanotechnol. Lett.*, 2014, **6**, 68–71.
- 136 L. Wang, J. Xue, B. Gao, P. Gao, C. Mou and J. Li, *RSC Adv.*, 2014, **4**, 64744–64746.
- 137 D. P. Wong, R. Suriyaprabha, R. Yuvakumar, V. Rajendran, Y.-T. Chen, B.-J. Hwang, L.-C. Chen and K.-H. Chen, *J. Mater. Chem. A*, 2014, **2**, 13437–13441.
- 138 L. Wang, Z. Schnepf and M. M. Titirici, *J. Mater. Chem. A*, 2013, **1**, 5269–5273.
- 139 A. Xing, S. Tian, H. Tang, D. Losic and Z. Bao, *RSC Adv.*, 2013, **3**, 10145–10149.
- 140 G. T.-K. Fey, Y.-D. Cho, C.-L. Chen, Y.-Y. Lin, T. P. Kumar and S.-H. Chan, *Pure Appl. Chem.*, 2010, **82**(11), 2157–2165.

- 141 G. T.-K. Fey and C.-L. Chen, *J. Power Sources*, 2001, **97-98**, 47–51.
- 142 H. Ai, W. Li, Z. Liu, D. Sun, H. Zhou and G.-C. Han, *J. Alloys Compd.*, 2021, **854**, 157156.
- 143 W. Li, H. Ai, Z. Liu, C. Wei, G.-C. Han and L. Zhan, *Ionics*, 2021, **27**, 3761–3768.
- 144 M. Imtiaz, Z. Chen, C. Zhu, R. Naz, I. Zada, H. Pan, D. Wang, W. Abbas, S. Nigar, Y. Li and S. Zhu, *Appl. Surf. Sci.*, 2020, **506**, 144811.
- 145 H. Wan and X. Hu, *J. Colloid Interface Sci.*, 2020, **558**, 242–250.
- 146 C. Zhu, J. Chen, S. Liu, B. Cheng, Y. Xu, P. Zhang, Q. Zhang, Y. Li and S. Zhong, *J. Mater. Sci.*, 2018, **53**, 5242–5254.
- 147 M. Imtiaz, Z. Chen, C. Zhu, H. Pan, I. Zada, Y. Li, S. W. Bokhari, R. Luan, S. Nigar and S. Zhu, *Electrochim. Acta*, 2018, **283**, 401–409.
- 148 J. Song, H. Bin, C. Zhu, S. Zhu, H. Pan, Y. Li, S. W. Bokhari and D. Zhang, *J. Mater. Sci. Mater. Electron.*, 2018, **29**, 12216–12220.
- 149 B. Wang, Y. Wang, Y. Peng, X. Wang, J. Wang and J. Zhao, *J. Power Sources*, 2018, **390**, 186–196.
- 150 M. Imtiaz, C. Zhu, Y. Li, M. Pak, I. Zada, S. W. Bokhari, Z. Chen, D. Zhang and S. Zhu, *J. Alloys Compd.*, 2017, **724**, 296–305.
- 151 M. Chen, D. Yan, X. Zhang, Z. Yu, G. Zhu, Y. Zhao, S. Lu, G. Chen, H. Xu and A. Yu, *Mater. Lett.*, 2017, **196**, 276–279.
- 152 S. Agarkar, P. Yadav, R. Fernandes, D. Kothari, A. Suryawanshi and S. Ogale, *Electrochim. Acta*, 2016, **212**, 535–544.
- 153 D. Yan, X. Luo, H. Zhang, G. Zhu, L. Chen, G. Chen, H. Xu and A. Yu, *J. Alloys Compd.*, 2016, **688**(Part A), 481–486.
- 154 S. Praneetha and A. V. Murugan, *ACS Sustain. Chem. Eng.*, 2015, **3**(2), 224–236.
- 155 J. Cheng and J. Du, *CrystEngComm*, 2012, **14**, 397–400.
- 156 E. Y. Matsubara, S. M. Lala and J. M. Rosolen, *J. Braz. Chem. Soc.*, 2010, **21**, 1877–1884.
- 157 R. Muruganantham, F.-M. Wang, R. A. Yuwono, M. Sabugaa and W.-R. Liu, *Energy Fuels*, 2021, **35**(13), 10878–10889.
- 158 R. Li, J. Huang, J. Li, L. Cao, X. Zhong, A. Yu and G. Lu, *J. Electroanal. Chem.*, 2020, **862**, 114044.
- 159 A. M. Hashem, H. Abuzeid, M. Kaus, S. Indris, H. Ehrenberg, A. Mauger and C. M. Julien, *Electrochim. Acta*, 2018, **262**, 74–81.
- 160 R. Zhou, Y. Chen, Y. Fu, Y. Li, S. Chen, Y. Song and L. Wang, *Ionics*, 2018, **24**, 1321–1328.
- 161 E. M. Lotfabad, J. Ding, K. Cui, A. Kohandehghan, W. P. Kalisvaart, M. Hazelton and D. Mitlin, *ACS Nano*, 2014, **8**(7), 7115–7129.

- 162 X. Sun, X. Wang, N. Feng, L. Qiao, X. Li and D. He, *J. Anal. Appl. Pyrolysis*, 2013, **100**, 181–185.
- 163 H. Wang, P. Zhang, X. Song, M. Zhang, X. Kong, S. Jin, X. Chang and Y. Zhang, *ACS Sustain. Chem. Eng.*, 2020, **8**(42), 15898–15905.
- 164 M. K. Majeed, A. Saleem, C. Wang, C. Song and J. Yang, *Chem. Eur. J.*, 2020, **26**(46), 10544–10549.
- 165 N. Kalidas, J. Riikonen, W. Xu, K. Lahtinen, T. Kallio and V. P. Lehto, *Mater. Chem. Phys.*, 2020, **245**, 122736.
- 166 T. Fang, X. Yu, X. Zhang, Y. Li, L. Yu, X. Liang, L. Liao and B. Li, *Waste Biomass Valor.*, 2020, **11**, 6981–6992.
- 167 F. Li, C. Deng, X. Liu, Y. Ding and J. Peng, *ChemistrySelect*, 2019, **4**(29), 8614–8620.
- 168 L. Zhou, Z. Yi, F. Lyu, Z. Wang, X. Zhao, Z. Sun, H. Cheng and Z. Lu, *Sci. China Mater.*, 2017, **60**, 1187–1195.
- 169 G. Xu, J. Han, B. Ding, P. Nie, J. Pan, H. Dou, H. Li and X. Zhang, *Green Chem.*, 2015, **17**, 1668–1674.
- 170 S. Bhardwaj, M. Sharon and T. Ishihara, *Curr. Appl. Phys.*, 2008, **8**(1), 71–77.
- 171 E. Endo, T. Kihira, S. Yamada, H. Imoto and K. Sekai, *J. Power Sources*, 2001, **93**(1-2), 215–223.
- 172 G. Zhao, W. Li, M. Ju, Y. Liu, Q. Rao, K. Zhou and F. Ai, *J. Electron. Mater.*, 2021, **50**, 1002–1009.
- 173 Y. Kong, Z. Ma, Y. Ye, G. He, Y. Sun, X. Zuo, X. Xiao and J. Nan, *ACS Appl. Energy Mater.*, 2018, **1**(12), 7065–7075.
- 174 F. Chen, J. Yang, T. Bai, B. Long and X. Zhou, *J. Electroanal. Chem.*, 2016, **768**, 18–26.
- 175 L. Chen, Y. Zhang, C. Lin, W. Yang, Y. Meng, Y. Guo, M. Li and D. Xiao, *J. Mater. Chem. A*, 2014, **2**, 9684–9690.
- 176 L. Peng, Y. Liang, J. Huang, L. Xing, H. Hu, Y. Xiao, H. Dong, Y. Liu and M. Zheng, *ACS Sustain. Chem. Eng.*, 2019, **7**(12), 10393–10402.
- 177 A. A. Arie, H. Kristianto, E. C. Cengiz and R. Demir-Cakan, *Ionics*, 2019, **25**, 2121–2129.
- 178 J. Ma, L. Yang, X. Yang, Y. Li, E. Zhao, S. Fan, G. Xu, T. Lou and H. Niu, *RSC Adv.*, 2020, **10**, 32345–32349.
- 179 Q. Xiao, G. Li, M. Li, R. Liu, H. Li, P. Ren, Y. Dong, M. Feng and C. Zhongwei, *J. Energy Chem.*, 2020, **44**, 61–67.
- 180 W. Su, C. Luo, B. Gao, X. Zhang, J. Fu, Y. Zheng and P. K. Chu, *Mater. Lett.*, 2021, **296**, 129926.
- 181 S.-Y. Lee, Y. Choi, J.-K. Kim, S.-J. Lee, J. S. Bae and E. D. Jeong, *J. Ind. Eng. Chem.*, 2021,

- 94**, 272–281.
- 182 T. Xiao, Q. Chen, W. Zhong, M. Yang, F. Cai, W. Liu, M. Ren and Y. Wang, *J. Alloys Compd.*, 2022, **907**, 164486.
- 183 J. Song, S. Guo, D. Ren, H. Liu, L. Kou, J. Su and P. Zheng, *Ceram. Int.*, 2020, **46**(8), 11570–11576.
- 184 P. Gu, D. Yang, X. Zhu, H. Sun and J. Li, *Opt. Quantum Electron.*, 2018, **50**(5), 223.
- 185 W. A. Ayalew and D. W. Ayele, *J. Sci.: Adv. Mater. Devices*, 2016, **1**(4), 488-494.
- 186 I. N. Setiawan, I. D. Giriantari, W. Ariastina and I. A. Swamardika, *Int. J. Eng. Res. Technol.*, 2020, **13**(9), 2498-2504.
- 187 A. Orona-Navar, I. Aguilar-Hernández, T. López-Luke, I. Zarazúa, V. Romero-Arellano, J. P. Guerrero and N. Ornelas-Soto, *J. Photochem. Photobiol. A Chem.*, 2020, **388**, 112216.
- 188 C. Wang, S. Yun, H. Xu, Z. Wang, F. Han, Y. Zhang, Y. Si and M. Sun, *Ceram. Int.*, 2020, **46**(3), 3292–3303.
- 189 A. Gunasekaran, A. Sorrentino, A. M. Asiri and S. Anandan, *Sol. Energy*, 2020, **208**, 160–165.
- 190 O. Adedokun, O. L. Adedeji, I. T. Bello, M. K. Awodele and A. O. Awodugba, *Chem. Phys. Impact*, 2021, **3**, 100039.
- 191 Hardeli, H. Sanjaya, P. Permatasari, I. P. Novita, N. F. Agdisti, R. Luli and L. Yunita, *Rasayan J. Chem.*, 2022, **15**(1), 569-578.
- 192 R. E. Y. Adu, *J. Turkish Chem. Soc. Sect. A Chem.*, 2022, **9**(4), 1285–1294.
- 193 E. Akman and H. S. Karapinar, *Sol. Energy*, 2022, **234**, 368–376.
- 194 M. Kandhasamy, G. Shanmugam, S. Kamaraj, B. Selvaraj, A. Gunasekeran and A. Sambandam, *Mater. Today Commun.*, 2023, **35**, 105505.
- 195 M. Hosseinnezhad, M. Ghahari, G. Mobarhan, S. Rouhani and M. Fathi, *Opt. Mater.*, 2023, **139**, 113775.
- 196 F. Aslan, *Opt. Quant. Electron.*, 2024, **56**, 645.
- 197 T. Rajaramanan, F. Heidari Gourji, Y. Elilan, S. Yohi, M. Senthilnathanan, P. Ravirajan and D. Velauthapillai, *Sci. Rep.*, 2023, **13**, 13844.
